# Supplementary material for: Prepollination barriers prevent gene flow between co-occurring bat-pollinated bromeliads in a montane forest
Source: PeerJ. 2025 Aug 22;13:e19652. doi: 10.7717/peerj.19652 (PMC12377363; doi:10.7717/peerj.19652)
Supplement: Supplemental Information 1 [file peerj-13-19652-s001.xlsx]

## Sheet: Data Information
Prepollination barriers prevent gene flow between co-occurring bat-pollinated bromeliads in a montane forest
Stephanie Núñez-Hidalgo & Alfredo Cascante-Marín
PeerJ
Calculations of reproductive isolation index (RI) due to floral phenology, interspecific incompatibility (incongruence) and hybrid fitness (seed production and viability), in addition to the contribution of each barrier to the total isolation between species,
We used the formula proposed by Sobel and Chen (2014) and describe in their excell spreadsheet as additional information.
Information (see methods for data collecting procedure)
Datasheet	Barrier type	Data type
RI Phenology summary	Pre-pollination	Summary of RI values between species pairs and reproductive seasons.
RI Phenology (4 sheets)	Pre-pollination	Raw data from floral phenology observations and RI estimations for each of the 4 different periods studied (2012-2013, 2014-2015, 2018-25019, 2020-2021).
RI Mechanical -floral size	Pre-pollination	Raw data from flower size measurements (stamen length, pistil length, corolla length, corolla aperture) used for the PCA.
RI incompatibiliy and seed production	Post-pollination	Data summary on fruit and seed number from intra- a interspecific crosses between species and calculations of RI values of intespecific incompatibility and hybrid progeny (number of seeds)
RI Seed germination	Post-pollination	Data summary on germination capacity of seeds from intra- and inter-specific crosses and calculations of RI values of hybrid fitness (seed germination capacity).
Total isolation	--	Calculations of cumulative strength, absolute contribution (AC), and relative contribution (RC) of multiple barriers between species pairs.

## Sheet: RI phenology summary
Floral Phenology Index (RIP)			Sobel & Cheng (2014)
Species	2012-2013	2014-2015	2018-2019	2020-2021	X̅	SD	CV
W.a x W. s	0.142682	0.18058	0.0534837	0.133533	0.12757	0.0534252	41.8792
W. s x W.a	0.4025	0.362533	0.108006	0.158767	0.257952	0.146233	56.6902
W.p x W.s	0.0978955	0.372615	0.60624	0.303402	0.345038	0.209603	60.7477
W. p x W.a	0.5347	0.550502	0.496649	0.284781	0.466658	0.12334	26.4304
W.a x W.p	0.809836	0.379788	0.32694	0.471065	0.496907	0.216947	43.6595
W.s x W. p	0.619451	0.433859	0.618933	0.544009	0.554063	0.0876237	15.8148
W. s x W. n	1	0.976539	1	0.955414	0.982988	0.0214535	2.18247
W.n x W.s	1	0.978761	1	0.889278	0.96701	0.0527795	5.45801
W.n. x W.a.	1	1	1	0.872865	0.968216	0.0635674	6.56542
W.p x W.n	0.945834	1	1	0.968295	0.978532	0.0264302	2.70101
W.a. x W.n.	1	1	1	0.936983	0.984246	0.0315083	3.20126
W.n x W.p	0.995656	1	1	0.969271	0.991232	0.014783	1.49138
X̅	0.71238	0.686265	0.684188	0.623972	0.676701	0.0873078	22.2351

## Sheet: RI phenology 2012-2013
		Sobel & Cheng, 2014														Sobel & Cheng, 2014														Sobel & Cheng, 2014
Year	Date	W. ampla (A)	W. subsecunda (B)	Prop. Of A open on ith day	Prop. Of B open on ith day	Fraction of flowers open on ith day that are species A	Fraction of flowers open on ith day that are species B	Overlap A	Sobel	Overlap B	Sobel			Year	Date	W. ampla (A)	W. pedicellata (B)	Prop. Of A open on ith day	Prop. Of B open on ith day	Fraction of flowers open on ith day that are species A	Fraction of flowers open on ith day that are species B	Overlap A	Sobel	Overlap B	Sobel			Year	Date	W. ampla (A)	W. nephrolepis (B)	Prop. Of A open on ith day	Prop. Of B open on ith day	Fraction of flowers open on ith day that are species A	Fraction of flowers open on ith day that are species B	Overlap A	Sobel	Overlap B	Sobel
		Ai	Bi	Ai/Atotal	Bi/Btotal	Ai/Bi+Ai	Bi/Ai+Bi	Ai/Atotal * Bi/Ai+Bi	Ai/Atotal * Ai/Bi+Ai	Bi/Btotal * Ai/Bi+Ai	Bi/Btotal * Bi/Ai+Bi					Ai	Bi	Ai/Atotal	Bi/Btotal	Ai/Bi+Ai	Bi/Ai+Bi	Ai/Atotal * Bi/Ai+Bi	Ai/Atotal * Ai/Bi+Ai	Bi/Btotal * Ai/Bi+Ai	Bi/Btotal * Bi/Ai+Bi					Ai	Bi	Ai/Atotal	Bi/Btotal	Ai/Bi+Ai	Bi/Ai+Bi	Ai/Atotal * Bi/Ai+Bi	Ai/Atotal * Ai/Bi+Ai	Bi/Btotal * Ai/Bi+Ai	Bi/Btotal * Bi/Ai+Bi
2012	Oct	0	0	0	0	#DIV/0!	#DIV/0!							2012	Oct	0	0	0	0	#DIV/0!	#DIV/0!							2012	Oct	0	0	0	0
2012	Oct	0	0	0	0	#DIV/0!	#DIV/0!							2012	Oct	0	0	0	0	#DIV/0!	#DIV/0!							2012	Oct	0	0	0	0
2012	Nov	0	0	0	0	#DIV/0!	#DIV/0!							2012	Nov	0	0	0	0	#DIV/0!	#DIV/0!							2012	Nov	0	0	0	0
2012	Nov	0	0	0	0	#DIV/0!	#DIV/0!							2012	Nov	0	0	0	0	#DIV/0!	#DIV/0!							2012	Nov	0	0	0	0
2012	Dec	1	0	0.0117647	0	1	0	0	0.0117647	0	0			2012	Dec	1	0	0.0117647	0	1	0	0	0.0117647	0	0			2012	Dec	1	0	0.0117647	0	1	0	0	0.0117647	0	0
2012	Dec	7	0	0.0823529	0	1	0	0	0.0823529	0	0			2012	Dec	7	0	0.0823529	0	1	0	0	0.0823529	0	0			2012	Dec	7	0	0.0823529	0	1	0	0	0.0823529	0	0
2013	Jan	14	1	0.164706	0.047619	0.933333	0.0666667	0.0109804	0.153725	0.0444444	0.0031746			2013	Jan	14	1	0.164706	0.0031746	0.933333	0.0666667	0.0109804	0.153725	0.00296296	0.00021164			2013	Jan	14	0	0.164706	0	1	0	0	0.164706	0	0
2013	Jan	19	4	0.223529	0.190476	0.826087	0.173913	0.0388747	0.184655	0.15735	0.0331263			2013	Jan	19	17	0.223529	0.0539683	0.527778	0.472222	0.105556	0.117974	0.0284832	0.025485			2013	Jan	19	0	0.223529	0	1	0	0	0.223529	0	0
2013	Feb	11	11	0.129412	0.52381	0.5	0.5	0.0647059	0.0647059	0.261905	0.261905			2013	Feb	11	216	0.129412	0.685714	0.0484581	0.951542	0.123141	0.00627105	0.0332284	0.652486			2013	Feb	11	0	0.129412	0	1	0	0	0.129412	0	0
2013	Feb	3	2	0.0352941	0.0952381	0.6	0.4	0.0141176	0.0211765	0.0571429	0.0380952			2013	Feb	3	1	0.0352941	0.0031746	0.75	0.25	0.00882353	0.0264706	0.00238095	0.000793651			2013	Feb	3	0	0.0352941	0	1	0	0	0.0352941	0	0
2013	Mar	9	0	0.105882	0	1	0	0	0.105882	0	0			2013	Mar	9	0	0.105882	0	1	0	0	0.105882	0	0			2013	Mar	9	0	0.105882	0	1	0	0	0.105882	0	0
2013	Mar	15	1	0.176471	0.047619	0.9375	0.0625	0.0110294	0.165441	0.0446429	0.00297619			2013	Mar	15	0	0.176471	0	1	0	0	0.176471	0	0			2013	Mar	15	0	0.176471	0	1	0	0	0.176471	0	0
2013	Apr	3	1	0.0352941	0.047619	0.75	0.25	0.00882353	0.0264706	0.0357143	0.0119048			2013	Apr	3	1	0.0352941	0.0031746	0.75	0.25	0.00882353	0.0264706	0.00238095	0.000793651			2013	Apr	3	0	0.0352941	0	1	0	0	0.0352941	0	0
2013	Apr	1	0	0.0117647	0	1	0	0	0.0117647	0	0			2013	Apr	1	0	0.0117647	0	1	0	0	0.0117647	0	0			2013	Apr	1	0	0.0117647	0	1	0	0	0.0117647	0	0
2013	May	2	1	0.0235294	0.047619	0.666667	0.333333	0.00784314	0.0156863	0.031746	0.015873			2013	May	2	77	0.0235294	0.244444	0.0253165	0.974684	0.0229337	0.000595681	0.00618847	0.238256			2013	May	2	0	0.0235294	0	1	0	0	0.0235294	0	0
2013	May	0	0	0	0	#DIV/0!	#DIV/0!							2013	May	0	0	0	0	#DIV/0!	#DIV/0!							2013	May	0	22	0	0.916667	0	1	0	0	0	0.916667
2013	Jun	0	0	0	0	#DIV/0!	#DIV/0!							2013	Jun	0	2	0	0.00634921	0	1	0	0	0	0.00634921			2013	Jun	0	1	0	0.0416667	0	1	0	0	0	0.0416667
2013	Jun	0	0	0	0	#DIV/0!	#DIV/0!							2013	Jun	0	0	0	0	#DIV/0!	#DIV/0!							2013	Jun	0	1	0	0.0416667	0	1	0	0	0	0.0416667
2013	Jul	0	0	0	0	#DIV/0!	#DIV/0!							2013	Jul	0	0	0	0	#DIV/0!	#DIV/0!							2013	Jul	0	0	0	0
2013	Jul	0	0	0	0	#DIV/0!	#DIV/0!							2013	Jul	0	0	0	0	#DIV/0!	#DIV/0!							2013	Jul	0	0	0	0
2013	Ago	0	0	0	0	#DIV/0!	#DIV/0!							2013	Ago	0	0	0	0	#DIV/0!	#DIV/0!							2013	Ago	0	0	0	0
2013	Ago	0	0	0	0	#DIV/0!	#DIV/0!							2013	Ago	0	0	0	0	#DIV/0!	#DIV/0!							2013	Ago	0	0	0	0
		85	21													85	315													85	24								0
		Atotal	Btotal				observed	0.156375	0.843625	0.632945	0.367055					Atotal	Btotal				observed	0.280257	0.719743	0.075625	0.924375					Atotal	Btotal				observed	0	1	0	1
	Total	106													Total	400													Total	109
					0.78932		0.78932												0.355882		0.355882												0		0
Btotal/(Atotal+Btotal)		0.198113			1.05205		1.85275							Btotal/(Atotal+Btotal)		0.7875			3.38702		1.17381							Btotal/(Atotal+Btotal)		0.220183			1.28235		4.54167
Atotal/(Btotal+Atotal)		0.801887			0.857318		0.5975							Atotal/(Btotal+Atotal)		0.2125			0.190164		0.4653							Atotal/(Btotal+Atotal)		0.779817			0		0
				Strength W. ampla (A)	0.142682	Strength W. subsecunda (B)	0.4025											Strength W. ampla (A)	0.809836	Strength W. pedicellata (B)	0.5347											Strength W. ampla (A)	1	Strength W. nephrolepis (B)	1
		Sobel & Cheng, 2014														Sobel & Cheng, 2014
Year	Date	W. subsecunda (A)	W. nephrolepis (B)	Prop. Of A open on ith day	Prop. Of B open on ith day	Fraction of flowers open on ith day that are species A	Fraction of flowers open on ith day that are species B	Overlap A	Sobel	Overlap B	Sobel			Year	Date	W. subsecunda (A)	W. pedicellata (B)	Prop. Of A open on ith day	Prop. Of B open on ith day	Fraction of flowers open on ith day that are species A	Fraction of flowers open on ith day that are species B	Overlap A	Sobel	Overlap B	Sobel
		Ai	Bi	Ai/Atotal	Bi/Btotal	Ai/Bi+Ai	Bi/Ai+Bi	Ai/Atotal * Bi/Ai+Bi	Ai/Atotal * Ai/Bi+Ai	Bi/Btotal * Ai/Bi+Ai	Bi/Btotal * Bi/Ai+Bi					Ai	Bi	Ai/Atotal	Bi/Btotal	Ai/Bi+Ai	Bi/Ai+Bi	Ai/Atotal * Bi/Ai+Bi	Ai/Atotal * Ai/Bi+Ai	Bi/Btotal * Ai/Bi+Ai	Bi/Btotal * Bi/Ai+Bi
2012	Oct	0	0	0	0	#DIV/0!	#DIV/0!							2012	Oct	0	0	0	0	#DIV/0!	#DIV/0!
2012	Oct	0	0	0	0	#DIV/0!	#DIV/0!							2012	Oct	0	0	0	0	#DIV/0!	#DIV/0!
2012	Nov	0	0	0	0	#DIV/0!	#DIV/0!							2012	Nov	0	0	0	0	#DIV/0!	#DIV/0!
2012	Nov	0	0	0	0	#DIV/0!	#DIV/0!							2012	Nov	0	0	0	0	#DIV/0!	#DIV/0!
2012	Dec	0	0	0	0	#DIV/0!	#DIV/0!							2012	Dec	0	0	0	0	#DIV/0!	#DIV/0!
2012	Dec	0	0	0	0	#DIV/0!	#DIV/0!							2012	Dec	0	0	0	0	#DIV/0!	#DIV/0!
2013	Jan	1	0	0.047619	0	1	0	0	0.047619	0	0			2013	Jan	1	1	0.047619	0.0031746	0.5	0.5	0.0238095	0.0238095	0.0015873	0.0015873
2013	Jan	4	0	0.190476	0	1	0	0	0.190476	0	0			2013	Jan	4	17	0.190476	0.0539683	0.190476	0.809524	0.154195	0.0362812	0.0102797	0.0436886
2013	Feb	11	0	0.52381	0	1	0	0	0.52381	0	0			2013	Feb	11	216	0.52381	0.685714	0.0484581	0.951542	0.498427	0.0253828	0.0332284	0.652486
2013	Feb	2	0	0.0952381	0	1	0	0	0.0952381	0	0			2013	Feb	2	1	0.0952381	0.0031746	0.666667	0.333333	0.031746	0.0634921	0.0021164	0.0010582
2013	Mar	0	0	0	0	#DIV/0!	#DIV/0!							2013	Mar	0	0	0	0	#DIV/0!	#DIV/0!
2013	Mar	1	0	0.047619	0	1	0	0	0.047619	0	0			2013	Mar	1	0	0.047619	0	1	0	0	0.047619	0	0
2013	Apr	1	0	0.047619	0	1	0	0	0.047619	0	0			2013	Apr	1	1	0.047619	0.0031746	0.5	0.5	0.0238095	0.0238095	0.0015873	0.0015873
2013	Apr	0	0	0	0	#DIV/0!	#DIV/0!							2013	Apr	0	0	0	0	#DIV/0!	#DIV/0!
2013	May	1	0	0.047619	0	1	0	0	0.047619	0	0			2013	May	1	77	0.047619	0.244444	0.0128205	0.987179	0.0470085	0.000610501	0.0031339	0.241311
2013	May	0	22	0	0.916667	0	1	0	0	0	0.916667			2013	May	0	0	0	0	#DIV/0!	#DIV/0!
2013	Jun	0	1	0	0.0416667	0	1	0	0	0	0.0416667			2013	Jun	0	2	0	0.00634921	0	1	0	0	0	0.00634921
2013	Jun	0	1	0	0.0416667	0	1	0	0	0	0.0416667			2013	Jun	0	0	0	0	#DIV/0!	#DIV/0!
2013	Jul	0	0	0	0	#DIV/0!	#DIV/0!							2013	Jul	0	0	0	0	#DIV/0!	#DIV/0!
2013	Jul	0	0	0	0	#DIV/0!	#DIV/0!							2013	Jul	0	0	0	0	#DIV/0!	#DIV/0!
2013	Ago	0	0	0	0	#DIV/0!	#DIV/0!							2013	Ago	0	0	0	0	#DIV/0!	#DIV/0!
2013	Ago	0	0	0	0	#DIV/0!	#DIV/0!							2013	Ago	0	0	0	0	#DIV/0!	#DIV/0!
		21	24													21	315
		Atotal	Btotal				observed	0	1	0	1					Atotal	Btotal				observed	0.778995	0.221005	0.051933	0.948067
	Total	45													Total	336
					0		0												0.830928		0.830928
Btotal/(Atotal+Btotal)		0.533333			2.14286		1.875							Btotal/(Atotal+Btotal)		0.9375			3.53607		1.01127
Atotal/(Btotal+Atotal)		0.466667			0		0							Atotal/(Btotal+Atotal)		0.0625			0.380549		0.902104
				Strength W. subsecunda (A)	1	Strength W. nephrolepis (B)	1											Strength W. subsecunda (A)	0.619451	Strength W. pedicellata (B)	0.0978955
		Sobel & Cheng, 2014
Year	Date	W. pedicellata (A)	W. nephrolepis (B)	Prop. Of A open on ith day	Prop. Of B open on ith day	Fraction of flowers open on ith day that are species A	Fraction of flowers open on ith day that are species B	Overlap A	Sobel	Overlap B	Sobel
		Ai	Bi	Ai/Atotal	Bi/Btotal	Ai/Bi+Ai	Bi/Ai+Bi	Ai/Atotal * Bi/Ai+Bi	Ai/Atotal * Ai/Bi+Ai	Bi/Btotal * Ai/Bi+Ai	Bi/Btotal * Bi/Ai+Bi
2012	Oct	0	0	0	0	#DIV/0!	#DIV/0!
2012	Oct	0	0	0	0	#DIV/0!	#DIV/0!
2012	Nov	0	0	0	0	#DIV/0!	#DIV/0!
2012	Nov	0	0	0	0	#DIV/0!	#DIV/0!
2012	Dec	0	0	0	0	#DIV/0!	#DIV/0!
2012	Dec	0	0	0	0	#DIV/0!	#DIV/0!
2013	Jan	1	0	0.0031746	0	1	0	0	0.0031746	0	0
2013	Jan	17	0	0.0539683	0	1	0	0	0.0539683	0	0
2013	Feb	216	0	0.685714	0	1	0	0	0.685714	0	0
2013	Feb	1	0	0.0031746	0	1	0	0	0.0031746	0	0
2013	Mar	0	0	0	0	#DIV/0!	#DIV/0!
2013	Mar	0	0	0	0	#DIV/0!	#DIV/0!
2013	Apr	1	0	0.0031746	0	1	0	0	0.0031746	0	0
2013	Apr	0	0	0	0	#DIV/0!	#DIV/0!
2013	May	77	0	0.244444	0	1	0	0	0.244444	0	0
2013	May	0	22	0	0.916667	0	1	0	0	0	0.916667
2013	Jun	2	1	0.00634921	0.0416667	0.666667	0.333333	0.0021164	0.0042328	0.0277778	0.0138889
2013	Jun	0	1	0	0.0416667	0	1	0	0	0	0.0416667
2013	Jul	0	0	0	0	#DIV/0!	#DIV/0!
2013	Jul	0	0	0	0	#DIV/0!	#DIV/0!
2013	Ago	0	0	0	0	#DIV/0!	#DIV/0!
2013	Ago	0	0	0	0	#DIV/0!	#DIV/0!
		315	24
		Atotal	Btotal				observed	0.0021164	0.997884	0.0277778	0.972222
	Total	339
					0.0298942		0.0298942
Btotal/(Atotal+Btotal)		0.0707965			1.07391		13.7326
Atotal/(Btotal+Atotal)		0.929204			0.0541656		0.00434428
				Strength W. pedicellata (A)	0.945834	Strength W. nephrolepis (B)	0.995656

## Sheet: RI phenology 2014-2015
		Sobel & Cheng, 2014														Sobel & Cheng, 2014														Sobel & Cheng, 2014
Year	Date	W. ampla (A)	W. subsecunda (B)	Prop. Of A open on ith day	Prop. Of B open on ith day	Fraction of flowers open on ith day that are species A	Fraction of flowers open on ith day that are species B	Overlap A	Sobel	Overlap B	Sobel			Year	Date	W. ampla (A)	W. pedicellata (B)	Prop. Of A open on ith day	Prop. Of B open on ith day	Fraction of flowers open on ith day that are species A	Fraction of flowers open on ith day that are species B	Overlap A	Sobel	Overlap B	Sobel			Year	Date	W. ampla (A)	W. nephrolepis (B)	Prop. Of A open on ith day	Prop. Of B open on ith day	Fraction of flowers open on ith day that are species A	Fraction of flowers open on ith day that are species B	Overlap A	Sobel	Overlap B	Sobel
	Date	Ai	Bi	Ai/Atotal	Bi/Btotal	Ai/Bi+Ai	Bi/Ai+Bi	Ai/Atotal * Bi/Ai+Bi	Ai/Atotal * Ai/Bi+Ai	Bi/Btotal * Ai/Bi+Ai	Bi/Btotal * Bi/Ai+Bi				Date	Ai	Bi	Ai/Atotal	Bi/Btotal	Ai/Bi+Ai	Bi/Ai+Bi	Ai/Atotal * Bi/Ai+Bi	Ai/Atotal * Ai/Bi+Ai	Bi/Btotal * Ai/Bi+Ai	Bi/Btotal * Bi/Ai+Bi					Ai	Bi	Ai/Atotal	Bi/Btotal	Ai/Bi+Ai	Bi/Ai+Bi	Ai/Atotal * Bi/Ai+Bi	Ai/Atotal * Ai/Bi+Ai	Bi/Btotal * Ai/Bi+Ai	Bi/Btotal * Bi/Ai+Bi
2014	Oct	0	0	0	0	#DIV/0!	#DIV/0!							2014	Oct	0	0	0	0	#DIV/0!	#DIV/0!							2014	Oct	0	0	0	0	#DIV/0!	#DIV/0!
2014	Oct	0	0	0	0	#DIV/0!	#DIV/0!							2014	Oct	0	0	0	0	#DIV/0!	#DIV/0!							2014	Oct	0	1	0	0.0119048	0	1	0	0	0	0.0119048
2014	Nov	0	0	0	0	#DIV/0!	#DIV/0!							2014	Nov	0	0	0	0	#DIV/0!	#DIV/0!							2014	Nov	0	0	0	0	#DIV/0!	#DIV/0!
2014	Nov	5	1	0.0208333	0.0107527	0.833333	0.166667	0.00347222	0.0173611	0.00896057	0.00179211			2014	Nov	5	0	0.0208333	0	1	0	0	0.0208333	0	0			2014	Nov	5	0	0.0208333	0	1	0	0	0.0208333	0	0
2014	Dec	10	2	0.0416667	0.0215054	0.833333	0.166667	0.00694444	0.0347222	0.0179211	0.00358423			2014	Dec	10	0	0.0416667	0	1	0	0	0.0416667	0	0			2014	Dec	10	0	0.0416667	0	1	0	0	0.0416667	0	0
2014	Dec	23	5	0.0958333	0.0537634	0.821429	0.178571	0.0171131	0.0787202	0.0441628	0.00960061			2014	Dec	23	0	0.0958333	0	1	0	0	0.0958333	0	0			2014	Dec	23	0	0.0958333	0	1	0	0	0.0958333	0	0
2015	Jan	30	0	0.125	0	1	0	0	0.125	0	0			2015	Jan	30	0	0.125	0	1	0	0	0.125	0	0			2015	Jan	30	0	0.125	0	1	0	0	0.125	0	0
2015	Jan	20	5	0.0833333	0.0537634	0.8	0.2	0.0166667	0.0666667	0.0430108	0.0107527			2015	Jan	20	0	0.0833333	0	1	0	0	0.0833333	0	0			2015	Jan	20	0	0.0833333	0	1	0	0	0.0833333	0	0
2015	Feb	17	3	0.0708333	0.0322581	0.85	0.15	0.010625	0.0602083	0.0274194	0.00483871			2015	Feb	17	4	0.0708333	0.0333333	0.809524	0.190476	0.0134921	0.0573413	0.0269841	0.00634921			2015	Feb	17	0	0.0708333	0	1	0	0	0.0708333	0	0
2015	Feb	38	5	0.158333	0.0537634	0.883721	0.116279	0.0184109	0.139922	0.0475119	0.00625156			2015	Feb	38	36	0.158333	0.3	0.513514	0.486486	0.077027	0.0813063	0.154054	0.145946			2015	Feb	38	0	0.158333	0	1	0	0	0.158333	0	0
2015	Mar	31	10	0.129167	0.107527	0.756098	0.243902	0.0315041	0.0976626	0.0813008	0.0262261			2015	Mar	31	7	0.129167	0.0583333	0.815789	0.184211	0.0237939	0.105373	0.0475877	0.0107456			2015	Mar	31	0	0.129167	0	1	0	0	0.129167	0	0
2015	Mar	14	22	0.0583333	0.236559	0.388889	0.611111	0.0356481	0.0226852	0.0919952	0.144564			2015	Mar	14	66	0.0583333	0.55	0.175	0.825	0.048125	0.0102083	0.09625	0.45375			2015	Mar	14	0	0.0583333	0	1	0	0	0.0583333	0	0
2015	Apr	14	25	0.0583333	0.268817	0.358974	0.641026	0.0373932	0.0209402	0.0964985	0.172319			2015	Apr	14	0	0.0583333	0	1	0	0	0.0583333	0	0			2015	Apr	14	0	0.0583333	0	1	0	0	0.0583333	0	0
2015	Apr	6	8	0.025	0.0860215	0.428571	0.571429	0.0142857	0.0107143	0.0368664	0.0491551			2015	Apr	6	4	0.025	0.0333333	0.6	0.4	0.01	0.015	0.02	0.0133333			2015	Apr	6	0	0.025	0	1	0	0	0.025	0	0
2015	May	12	2	0.05	0.0215054	0.857143	0.142857	0.00714286	0.0428571	0.0184332	0.0030722			2015	May	12	1	0.05	0.00833333	0.923077	0.0769231	0.00384615	0.0461538	0.00769231	0.000641026			2015	May	12	0	0.05	0	1	0	0	0.05	0	0
2015	May	13	4	0.0541667	0.0430108	0.764706	0.235294	0.0127451	0.0414216	0.0328906	0.0101202			2015	May	13	2	0.0541667	0.0166667	0.866667	0.133333	0.00722222	0.0469444	0.0144444	0.00222222			2015	May	13	0	0.0541667	0	1	0	0	0.0541667	0	0
2015	Jun	7	0	0.0291667	0	1	0	0	0.0291667	0	0			2015	Jun	7	0	0.0291667	0	1	0	0	0.0291667	0	0			2015	Jun	7	0	0.0291667	0	1	0	0	0.0291667	0	0
2015	Jun	0	0	0	0	#DIV/0!	#DIV/0!							2015	Jun	0	0	0	0	#DIV/0!	#DIV/0!							2015	Jun	0	5	0	0.0595238	0	1	0	0	0	0.0595238
2015	Jul	0	1	0	0.0107527	0	1	0	0	0	0.0107527			2015	Jul	0	0	0	0	#DIV/0!	#DIV/0!							2015	Jul	0	73	0	0.869048	0	1	0	0	0	0.869048
2015	Jul	0	0	0	0	#DIV/0!	#DIV/0!							2015	Jul	0	0	0	0	#DIV/0!	#DIV/0!							2015	Jul	0	5	0	0.0595238	0	1	0	0	0	0.0595238
2015	Ago	0	0	0	0	#DIV/0!	#DIV/0!							2015	Ago	0	0	0	0	#DIV/0!	#DIV/0!							2015	Ago	0	0	0	0	#DIV/0!	#DIV/0!
2015	Ago	0	0	0	0	#DIV/0!	#DIV/0!							2015	Ago	0	0	0	0	#DIV/0!	#DIV/0!							2015	Ago	0	0	0	0	#DIV/0!	#DIV/0!
		240	93													240	120													240	84
		Atotal	Btotal				observed	0.211951	0.788049	0.546971	0.453029					Atotal	Btotal				observed	0.183506	0.816494	0.367013	0.632987					Atotal	Btotal				observed	0	1	0	1
	Total	333													Total	360													Total	324
					0.758922		0.758922												0.550519		0.550519												0		0
Btotal/(Atotal+Btotal)		0.279279			1.09342		1.62214							Btotal/(Atotal+Btotal)		0.333333			1.22474		1.89896							Btotal/(Atotal+Btotal)		0.259259			1.35		3.85714
Atotal/(Btotal+Atotal)		0.720721			0.81942		0.637467							Atotal/(Btotal+Atotal)		0.666667			0.620212		0.449498							Atotal/(Btotal+Atotal)		0.740741			0		0
				Strength W. ampla (A)	0.18058	Strength W. subsecunda (B)	0.362533											Strength W. ampla (A)	0.379788	Strength W. pedicellata (B)	0.550502											Strength W. ampla (A)	1	Strength W. nephrolepis (B)	1
		Sobel & Cheng, 2014														Sobel & Cheng, 2014
Year	Date	W. subsecunda (A)	W. nephrolepis (B)	Prop. Of A open on ith day	Prop. Of B open on ith day	Fraction of flowers open on ith day that are species A	Fraction of flowers open on ith day that are species B	Overlap A	Sobel	Overlap B	Sobel			Year	Date	W. subsecunda (A)	W. pedicellata (B)	Prop. Of A open on ith day	Prop. Of B open on ith day	Fraction of flowers open on ith day that are species A	Fraction of flowers open on ith day that are species B	Overlap A	Sobel	Overlap B	Sobel
		Ai	Bi	Ai/Atotal	Bi/Btotal	Ai/Bi+Ai	Bi/Ai+Bi	Ai/Atotal * Bi/Ai+Bi	Ai/Atotal * Ai/Bi+Ai	Bi/Btotal * Ai/Bi+Ai	Bi/Btotal * Bi/Ai+Bi					Ai	Bi	Ai/Atotal	Bi/Btotal	Ai/Bi+Ai	Bi/Ai+Bi	Ai/Atotal * Bi/Ai+Bi	Ai/Atotal * Ai/Bi+Ai	Bi/Btotal * Ai/Bi+Ai	Bi/Btotal * Bi/Ai+Bi
2014	Oct	0	0	0	0	#DIV/0!	#DIV/0!							2014	Oct	0	0	0	0	#DIV/0!	#DIV/0!
2014	Oct	0	1	0	0.0119048	0	1	0	0	0	0.0119048			2014	Oct	0	0	0	0	#DIV/0!	#DIV/0!
2014	Nov	0	0	0	0	#DIV/0!	#DIV/0!							2014	Nov	0	0	0	0	#DIV/0!	#DIV/0!
2014	Nov	1	0	0.0107527	0	1	0	0	0.0107527	0	0			2014	Nov	1	0	0.0107527	0	1	0	0	0.0107527	0	0
2014	Dec	2	0	0.0215054	0	1	0	0	0.0215054	0	0			2014	Dec	2	0	0.0215054	0	1	0	0	0.0215054	0	0
2014	Dec	5	0	0.0537634	0	1	0	0	0.0537634	0	0			2014	Dec	5	0	0.0537634	0	1	0	0	0.0537634	0	0
2015	Jan	0	0	0	0	#DIV/0!	#DIV/0!							2015	Jan	0	0	0	0	#DIV/0!	#DIV/0!
2015	Jan	5	0	0.0537634	0	1	0	0	0.0537634	0	0			2015	Jan	5	0	0.0537634	0	1	0	0	0.0537634	0	0
2015	Feb	3	0	0.0322581	0	1	0	0	0.0322581	0	0			2015	Feb	3	4	0.0322581	0.0333333	0.428571	0.571429	0.0184332	0.0138249	0.0142857	0.0190476
2015	Feb	5	0	0.0537634	0	1	0	0	0.0537634	0	0			2015	Feb	5	36	0.0537634	0.3	0.121951	0.878049	0.0472069	0.00655652	0.0365854	0.263415
2015	Mar	10	0	0.107527	0	1	0	0	0.107527	0	0			2015	Mar	10	7	0.107527	0.0583333	0.588235	0.411765	0.0442758	0.0632511	0.0343137	0.0240196
2015	Mar	22	0	0.236559	0	1	0	0	0.236559	0	0			2015	Mar	22	66	0.236559	0.55	0.25	0.75	0.177419	0.0591398	0.1375	0.4125
2015	Apr	25	0	0.268817	0	1	0	0	0.268817	0	0			2015	Apr	25	0	0.268817	0	1	0	0	0.268817	0	0
2015	Apr	8	0	0.0860215	0	1	0	0	0.0860215	0	0			2015	Apr	8	4	0.0860215	0.0333333	0.666667	0.333333	0.0286738	0.0573477	0.0222222	0.0111111
2015	May	2	0	0.0215054	0	1	0	0	0.0215054	0	0			2015	May	2	1	0.0215054	0.00833333	0.666667	0.333333	0.00716846	0.0143369	0.00555556	0.00277778
2015	May	4	0	0.0430108	0	1	0	0	0.0430108	0	0			2015	May	4	2	0.0430108	0.0166667	0.666667	0.333333	0.0143369	0.0286738	0.0111111	0.00555556
2015	Jun	0	0	0	0	#DIV/0!	#DIV/0!							2015	Jun	0	0	0	0	#DIV/0!	#DIV/0!
2015	Jun	0	5	0	0.0595238	0	1	0	0	0	0.0595238			2015	Jun	0	0	0	0	#DIV/0!	#DIV/0!
2015	Jul	1	73	0.0107527	0.869048	0.0135135	0.986486	0.0106074	0.000145307	0.0117439	0.857304			2015	Jul	1	0	0.0107527	0	1	0	0	0.0107527	0	0
2015	Jul	0	5	0	0.0595238	0	1	0	0	0	0.0595238			2015	Jul	0	0	0	0	#DIV/0!	#DIV/0!
2015	Ago	0	0	0	0	#DIV/0!	#DIV/0!							2015	Ago	0	0	0	0	#DIV/0!	#DIV/0!
2015	Ago	0	0	0	0	#DIV/0!	#DIV/0!							2015	Ago	0	0	0	0	#DIV/0!	#DIV/0!
		93	84													93	120
		Atotal	Btotal				observed	0.0106074	0.989393	0.0117439	0.988256					Atotal	Btotal				observed	0.337514	0.662486	0.261574	0.738426
	Total	177													Total	213
					0.0223513		0.0223513												0.599088		0.599088
Btotal/(Atotal+Btotal)		0.474576			1.88304		2.0824							Btotal/(Atotal+Btotal)		0.56338			1.51731		1.31071
Atotal/(Btotal+Atotal)		0.525424			0.0234611		0.0212389							Atotal/(Btotal+Atotal)		0.43662			0.566141		0.627385
				Strength W. subsecunda (A)	0.976539	Strength W. nephrolepis (B)	0.978761											Strength W. subsecunda (A)	0.433859	Strength W. pedicellata (B)	0.372615
		Sobel & Cheng, 2014
Year	Date	W. pedicellata (A)	W. nephrolepis (B)	Prop. Of A open on ith day	Prop. Of B open on ith day	Fraction of flowers open on ith day that are species A	Fraction of flowers open on ith day that are species B	Overlap A	Sobel	Overlap B	Sobel
		Ai	Bi	Ai/Atotal	Bi/Btotal	Ai/Bi+Ai	Bi/Ai+Bi	Ai/Atotal * Bi/Ai+Bi	Ai/Atotal * Ai/Bi+Ai	Bi/Btotal * Ai/Bi+Ai	Bi/Btotal * Bi/Ai+Bi
2014	Oct	0	0	0	0	#DIV/0!	#DIV/0!
2014	Oct	0	1	0	0.0119048	0	1	0	0	0	0.0119048
2014	Nov	0	0	0	0	#DIV/0!	#DIV/0!
2014	Nov	0	0	0	0	#DIV/0!	#DIV/0!
2014	Dec	0	0	0	0	#DIV/0!	#DIV/0!
2014	Dec	0	0	0	0	#DIV/0!	#DIV/0!
2015	Jan	0	0	0	0	#DIV/0!	#DIV/0!
2015	Jan	0	0	0	0	#DIV/0!	#DIV/0!
2015	Feb	4	0	0.0333333	0	1	0	0	0.0333333	0	0
2015	Feb	36	0	0.3	0	1	0	0	0.3	0	0
2015	Mar	7	0	0.0583333	0	1	0	0	0.0583333	0	0
2015	Mar	66	0	0.55	0	1	0	0	0.55	0	0
2015	Apr	0	0	0	0	#DIV/0!	#DIV/0!
2015	Apr	4	0	0.0333333	0	1	0	0	0.0333333	0	0
2015	May	1	0	0.00833333	0	1	0	0	0.00833333	0	0
2015	May	2	0	0.0166667	0	1	0	0	0.0166667	0	0
2015	Jun	0	0	0	0	#DIV/0!	#DIV/0!
2015	Jun	0	5	0	0.0595238	0	1	0	0	0	0.0595238
2015	Jul	0	73	0	0.869048	0	1	0	0	0	0.869048
2015	Jul	0	5	0	0.0595238	0	1	0	0	0	0.0595238
2015	Ago	0	0	0	0	#DIV/0!	#DIV/0!
2015	Ago	0	0	0	0	#DIV/0!	#DIV/0!
		120	84
		Atotal	Btotal				observed	0	1	0	1
	Total	204
					0		0
Btotal/(Atotal+Btotal)		0.411765			1.7		2.42857
Atotal/(Btotal+Atotal)		0.588235			0		0
				Strength W. pedicellata (A)	1	Strength W. nephrolepis (B)	1

## Sheet: RI phenology 2018-2019
		Sobel & Cheng, 2014														Sobel & Cheng, 2014														Sobel & Cheng, 2014
Year	Date	W. ampla (A)	W. subsecunda (B)	Prop. Of A open on ith day	Prop. Of B open on ith day	Fraction of flowers open on ith day that are species A	Fraction of flowers open on ith day that are species B	Overlap A	Sobel	Overlap B	Sobel			Year	Date	W. ampla (A)	W. pedicellata (B)	Prop. Of A open on ith day	Prop. Of B open on ith day	Fraction of flowers open on ith day that are species A	Fraction of flowers open on ith day that are species B	Overlap A	Sobel	Overlap B	Sobel			Year	Date	W. ampla (A)	W. nephrolepis (B)	Prop. Of A open on ith day	Prop. Of B open on ith day	Fraction of flowers open on ith day that are species A	Fraction of flowers open on ith day that are species B	Overlap A	Sobel	Overlap B	Sobel
	Date	Ai	Bi	Ai/Atotal	Bi/Btotal	Ai/Bi+Ai	Bi/Ai+Bi	Ai/Atotal * Bi/Ai+Bi	Ai/Atotal * Ai/Bi+Ai	Bi/Btotal * Ai/Bi+Ai	Bi/Btotal * Bi/Ai+Bi				Date	Ai	Bi	Ai/Atotal	Bi/Btotal	Ai/Bi+Ai	Bi/Ai+Bi	Ai/Atotal * Bi/Ai+Bi	Ai/Atotal * Ai/Bi+Ai	Bi/Btotal * Ai/Bi+Ai	Bi/Btotal * Bi/Ai+Bi					Ai	Bi	Ai/Atotal	Bi/Btotal	Ai/Bi+Ai	Bi/Ai+Bi	Ai/Atotal * Bi/Ai+Bi	Ai/Atotal * Ai/Bi+Ai	Bi/Btotal * Ai/Bi+Ai	Bi/Btotal * Bi/Ai+Bi
2018	Oct	0	0	0	0	#DIV/0!	#DIV/0!							2018	Oct	0	0	0	0	#DIV/0!	#DIV/0!							2018	Oct	0	0	0	0	#DIV/0!	#DIV/0!
2018	Oct	0	0	0	0	#DIV/0!	#DIV/0!							2019	Nov	0	0	0	0	#DIV/0!	#DIV/0!							2019	Nov	0	0	0	0	#DIV/0!	#DIV/0!
2018	Nov	0	0	0	0	#DIV/0!	#DIV/0!							2018	Nov	0	0	0	0	#DIV/0!	#DIV/0!							2018	Nov	0	0	0	0	#DIV/0!	#DIV/0!
2018	Nov	0	2	0	0.021978	0	1	0	0	0	0.021978			2018	Nov	0	0	0	0	#DIV/0!	#DIV/0!							2018	Nov	0	0	0	0	#DIV/0!	#DIV/0!
2018	Dec	0	0	0	0	#DIV/0!	#DIV/0!							2018	Dec	0	0	0	0	#DIV/0!	#DIV/0!							2018	Dec	0	0	0	0	#DIV/0!	#DIV/0!
2018	Dec	12	8	0.0615385	0.0879121	0.6	0.4	0.0246154	0.0369231	0.0527473	0.0351648			2018	Dec	12	0	0.0615385	0	1	0	0	0.0615385	0	0			2018	Dec	12	0	0.0615385	0	1	0	0	0.0615385	0	0
2019	Jan	17	14	0.0871795	0.153846	0.548387	0.451613	0.0393714	0.0478081	0.0843672	0.0694789			2019	Jan	17	0	0.0871795	0	1	0	0	0.0871795	0	0			2019	Jan	17	0	0.0871795	0	1	0	0	0.0871795	0	0
2019	Jan	20	10	0.102564	0.10989	0.666667	0.333333	0.034188	0.0683761	0.0732601	0.03663			2019	Jan	20	0	0.102564	0	1	0	0	0.102564	0	0			2019	Jan	20	0	0.102564	0	1	0	0	0.102564	0	0
2019	Feb	28	10	0.14359	0.10989	0.736842	0.263158	0.0377868	0.105803	0.0809717	0.0289184			2019	Feb	28	0	0.14359	0	1	0	0	0.14359	0	0			2019	Feb	28	0	0.14359	0	1	0	0	0.14359	0	0
2019	Feb	31	8	0.158974	0.0879121	0.794872	0.205128	0.0326101	0.126364	0.0698788	0.0180332			2019	Feb	31	1	0.158974	0.0104167	0.96875	0.03125	0.00496795	0.154006	0.0100911	0.000325521			2019	Feb	31	0	0.158974	0	1	0	0	0.158974	0	0
2019	Mar	20	7	0.102564	0.0769231	0.740741	0.259259	0.0265907	0.0759734	0.0569801	0.019943			2019	Mar	20	29	0.102564	0.302083	0.408163	0.591837	0.0607012	0.0418629	0.123299	0.178784			2019	Mar	20	0	0.102564	0	1	0	0	0.102564	0	0
2019	Mar	16	16	0.0820513	0.175824	0.5	0.5	0.0410256	0.0410256	0.0879121	0.0879121			2019	Mar	16	3	0.0820513	0.03125	0.842105	0.157895	0.0129555	0.0690958	0.0263158	0.00493421			2019	Mar	16	0	0.0820513	0	1	0	0	0.0820513	0	0
2019	Apr	21	9	0.107692	0.0989011	0.7	0.3	0.0323077	0.0753846	0.0692308	0.0296703			2019	Apr	21	5	0.107692	0.0520833	0.807692	0.192308	0.0207101	0.0869822	0.0420673	0.010016			2019	Apr	21	0	0.107692	0	1	0	0	0.107692	0	0
2019	Apr	21	7	0.107692	0.0769231	0.75	0.25	0.0269231	0.0807692	0.0576923	0.0192308			2019	Apr	21	35	0.107692	0.364583	0.375	0.625	0.0673077	0.0403846	0.136719	0.227865			2019	Apr	21	0	0.107692	0	1	0	0	0.107692	0	0
2019	May	9	0	0.0461538	0	1	0	0	0.0461538	0	0			2019	May	9	23	0.0461538	0.239583	0.28125	0.71875	0.0331731	0.0129808	0.0673828	0.172201			2019	May	9	0	0.0461538	0	1	0	0	0.0461538	0	0
2019	May	0	0	0	0	#DIV/0!	#DIV/0!							2019	May	0	0	0	0	#DIV/0!	#DIV/0!							2019	May	0	9	0	0.130435	0	1	0	0	0	0.130435
2019	Jun	0	0	0	0	#DIV/0!	#DIV/0!							2019	Jun	0	0	0	0	#DIV/0!	#DIV/0!							2019	Jun	0	60	0	0.869565	0	1	0	0	0	0.869565
2019	Jun	0	0	0	0	#DIV/0!	#DIV/0!							2019	Jun	0	0	0	0	#DIV/0!	#DIV/0!							2019	Jun	0	0	0	0	#DIV/0!	#DIV/0!
2019	Jul	0	0	0	0	#DIV/0!	#DIV/0!							2019	Jul	0	0	0	0	#DIV/0!	#DIV/0!							2019	Jul	0	0	0	0	#DIV/0!	#DIV/0!
2019	Jul	0	0	0	0	#DIV/0!	#DIV/0!							2019	Jul	0	0	0	0	#DIV/0!	#DIV/0!							2019	Jul	0	0	0	0	#DIV/0!	#DIV/0!
2019	Ago	0	0	0	0	#DIV/0!	#DIV/0!							2019	Ago	0	0	0	0	#DIV/0!	#DIV/0!							2019	Ago	0	0	0	0	#DIV/0!	#DIV/0!
2019	Ago	0	0	0	0	#DIV/0!	#DIV/0!							2019	Ago	0	0	0	0	#DIV/0!	#DIV/0!							2019	Ago	0	0	0	0	#DIV/0!	#DIV/0!
		195	91													195	96													195	69
		Atotal	Btotal				observed	0.295419	0.704581	0.63304	0.36696					Atotal	Btotal				observed	0.199815	0.800185	0.405875	0.594125					Atotal	Btotal				observed	0	1	0	1
	Total	286													Total	291													Total	264
					0.928459		0.928459												0.605691		0.605691												0		0
Btotal/(Atotal+Btotal)		0.318182			1.03339		1.1533							Btotal/(Atotal+Btotal)		0.329897			1.19412		1.80094							Btotal/(Atotal+Btotal)		0.261364			1.35385		3.82609
Atotal/(Btotal+Atotal)		0.681818			0.946516		0.891994							Atotal/(Btotal+Atotal)		0.670103			0.67306		0.503351							Atotal/(Btotal+Atotal)		0.738636			0		0
				Strength W. ampla (A)	0.0534837	Strength W. subsecunda (B)	0.108006											Strength W. ampla (A)	0.32694	Strength W. pedicellata (B)	0.496649											Strength W. ampla (A)	1	Strength W. nephrolepis (B)	1
		Sobel & Cheng, 2014														Sobel & Cheng, 2014
Year	Date	W. subsecunda (A)	W. nephrolepis (B)	Prop. Of A open on ith day	Prop. Of B open on ith day	Fraction of flowers open on ith day that are species A	Fraction of flowers open on ith day that are species B	Overlap A	Sobel	Overlap B	Sobel			Year	Date	W. subsecunda (A)	W. pedicellata (B)	Prop. Of A open on ith day	Prop. Of B open on ith day	Fraction of flowers open on ith day that are species A	Fraction of flowers open on ith day that are species B	Overlap A	Sobel	Overlap B	Sobel
		Ai	Bi	Ai/Atotal	Bi/Btotal	Ai/Bi+Ai	Bi/Ai+Bi	Ai/Atotal * Bi/Ai+Bi	Ai/Atotal * Ai/Bi+Ai	Bi/Btotal * Ai/Bi+Ai	Bi/Btotal * Bi/Ai+Bi					Ai	Bi	Ai/Atotal	Bi/Btotal	Ai/Bi+Ai	Bi/Ai+Bi	Ai/Atotal * Bi/Ai+Bi	Ai/Atotal * Ai/Bi+Ai	Bi/Btotal * Ai/Bi+Ai	Bi/Btotal * Bi/Ai+Bi
2018	Oct	0	0	0	0	#DIV/0!	#DIV/0!							2018	Oct	0	0	0	0	#DIV/0!	#DIV/0!
2018	Oct	0	0	0	0	#DIV/0!	#DIV/0!							2018	Oct	0	0	0	0	#DIV/0!	#DIV/0!
2018	Nov	0	0	0	0	#DIV/0!	#DIV/0!							2018	Nov	0	0	0	0	#DIV/0!	#DIV/0!
2018	Nov	2	0	0.021978	0	1	0	0	0.021978	0	0			2018	Nov	2	0	0.021978	0	1	0	0	0.021978	0	0
2018	Dec	0	0	0	0	#DIV/0!	#DIV/0!							2018	Dec	0	0	0	0	#DIV/0!	#DIV/0!
2018	Dec	8	0	0.0879121	0	1	0	0	0.0879121	0	0			2018	Dec	8	0	0.0879121	0	1	0	0	0.0879121	0	0
2019	Jan	14	0	0.153846	0	1	0	0	0.153846	0	0			2019	Jan	14	0	0.153846	0	1	0	0	0.153846	0	0
2019	Jan	10	0	0.10989	0	1	0	0	0.10989	0	0			2019	Jan	10	0	0.10989	0	1	0	0	0.10989	0	0
2019	Feb	10	0	0.10989	0	1	0	0	0.10989	0	0			2019	Feb	10	0	0.10989	0	1	0	0	0.10989	0	0
2019	Feb	8	0	0.0879121	0	1	0	0	0.0879121	0	0			2019	Feb	8	1	0.0879121	0.0104167	0.888889	0.111111	0.00976801	0.0781441	0.00925926	0.00115741
2019	Mar	7	0	0.0769231	0	1	0	0	0.0769231	0	0			2019	Mar	7	29	0.0769231	0.302083	0.194444	0.805556	0.0619658	0.0149573	0.0587384	0.243345
2019	Mar	16	0	0.175824	0	1	0	0	0.175824	0	0			2019	Mar	16	3	0.175824	0.03125	0.842105	0.157895	0.0277617	0.148062	0.0263158	0.00493421
2019	Apr	9	0	0.0989011	0	1	0	0	0.0989011	0	0			2019	Apr	9	5	0.0989011	0.0520833	0.642857	0.357143	0.0353218	0.0635793	0.0334821	0.0186012
2019	Apr	7	0	0.0769231	0	1	0	0	0.0769231	0	0			2019	Apr	7	35	0.0769231	0.364583	0.166667	0.833333	0.0641026	0.0128205	0.0607639	0.303819
2019	May	0	0	0	0	#DIV/0!	#DIV/0!							2019	May	0	23	0	0.239583	0	1	0	0	0	0.239583
2019	May	0	9	0	0.130435	0	1	0	0	0	0.130435			2019	May	0	0	0	0	#DIV/0!	#DIV/0!
2019	Jun	0	60	0	0.869565	0	1	0	0	0	0.869565			2019	Jun	0	0	0	0	#DIV/0!	#DIV/0!
2019	Jun	0	0	0	0	#DIV/0!	#DIV/0!							2019	Jun	0	0	0	0	#DIV/0!	#DIV/0!
2019	Jul	0	0	0	0	#DIV/0!	#DIV/0!							2019	Jul	0	0	0	0	#DIV/0!	#DIV/0!
2019	Jul	0	0	0	0	#DIV/0!	#DIV/0!							2019	Jul	0	0	0	0	#DIV/0!	#DIV/0!
2019	Ago	0	0	0	0	#DIV/0!	#DIV/0!							2019	Ago	0	0	0	0	#DIV/0!	#DIV/0!
2019	Ago	0	0	0	0	#DIV/0!	#DIV/0!							2019	Ago	0	0	0	0	#DIV/0!	#DIV/0!
		91	69	1	1											91	96
		Atotal	Btotal				observed	0	1	0	1					Atotal	Btotal				observed	0.19892	0.80108	0.18856	0.81144
	Total	160													Total	187
					0		0												0.387479		0.387479
Btotal/(Atotal+Btotal)		0.43125			1.75824		2.31884							Btotal/(Atotal+Btotal)		0.513369			1.64618		1.58062
Atotal/(Btotal+Atotal)		0.56875			0		0							Atotal/(Btotal+Atotal)		0.486631			0.381067		0.39376
				Strength W. subsecunda (A)	1	Strength W. nephrolepis (B)	1											Strength W. subsecunda (A)	0.618933	Strength W. pedicellata (B)	0.60624
		Sobel & Cheng, 2014
Year	Date	W. pedicellata (A)	W. nephrolepis (B)	Prop. Of A open on ith day	Prop. Of B open on ith day	Fraction of flowers open on ith day that are species A	Fraction of flowers open on ith day that are species B	Overlap A	Sobel	Overlap B	Sobel
		Ai	Bi	Ai/Atotal	Bi/Btotal	Ai/Bi+Ai	Bi/Ai+Bi	Ai/Atotal * Bi/Ai+Bi	Ai/Atotal * Ai/Bi+Ai	Bi/Btotal * Ai/Bi+Ai	Bi/Btotal * Bi/Ai+Bi
2018	Oct	0	0	0	0	#DIV/0!	#DIV/0!
2018	Oct	0	0	0	0	#DIV/0!	#DIV/0!
2018	Nov	0	0	0	0	#DIV/0!	#DIV/0!
2018	Nov	0	0	0	0	#DIV/0!	#DIV/0!
2018	Dec	0	0	0	0	#DIV/0!	#DIV/0!
2018	Dec	0	0	0	0	#DIV/0!	#DIV/0!
2019	Jan	0	0	0	0	#DIV/0!	#DIV/0!
2019	Jan	0	0	0	0	#DIV/0!	#DIV/0!
2019	Feb	0	0	0	0	#DIV/0!	#DIV/0!
2019	Feb	1	0	0.0104167	0	1	0	0	0.0104167	0	0
2019	Mar	29	0	0.302083	0	1	0	0	0.302083	0	0
2019	Mar	3	0	0.03125	0	1	0	0	0.03125	0	0
2019	Apr	5	0	0.0520833	0	1	0	0	0.0520833	0	0
2019	Apr	35	0	0.364583	0	1	0	0	0.364583	0	0
2019	May	23	0	0.239583	0	1	0	0	0.239583	0	0
2019	May	0	9	0	0.130435	0	1	0	0	0	0.130435
2019	Jun	0	60	0	0.869565	0	1	0	0	0	0.869565
2019	Jun	0	0	0	0	#DIV/0!	#DIV/0!
2019	Jul	0	0	0	0	#DIV/0!	#DIV/0!
2019	Jul	0	0	0	0	#DIV/0!	#DIV/0!
2019	Ago	0	0	0	0	#DIV/0!	#DIV/0!
2019	Ago	0	0	0	0	#DIV/0!	#DIV/0!
		96	69
		Atotal	Btotal				observed	0	1	0	1
	Total	165
					0		0
Btotal/(Atotal+Btotal)		0.418182			1.71875		2.3913
Atotal/(Btotal+Atotal)		0.581818			0		0
				Strength W. pedicellata (A)	1	Strength W. nephrolepis (B)	1

## Sheet: RI phenology 2020-2021
		Sobel & Cheng, 2014														Sobel & Cheng, 2014														Sobel & Cheng, 2014
Year	Date	W. ampla (A)	W. subsecunda (B)	Prop. Of A open on ith day	Prop. Of B open on ith day	Fraction of flowers open on ith day that are species A	Fraction of flowers open on ith day that are species B	Overlap A	Sobel	Overlap B	Sobel			Year	Date	W. ampla (A)	W. pedicellata (B)	Prop. Of A open on ith day	Prop. Of B open on ith day	Fraction of flowers open on ith day that are species A	Fraction of flowers open on ith day that are species B	Overlap A	Sobel	Overlap B	Sobel			Year	Date	W. ampla (A)	W. nephrolepis (B)	Prop. Of A open on ith day	Prop. Of B open on ith day	Fraction of flowers open on ith day that are species A	Fraction of flowers open on ith day that are species B	Overlap A	Sobel	Overlap B	Sobel
		Ai	Bi	Ai/Atotal	Bi/Btotal	Ai/Bi+Ai	Bi/Ai+Bi	Ai/Atotal * Bi/Ai+Bi	Ai/Atotal * Ai/Bi+Ai	Bi/Btotal * Ai/Bi+Ai	Bi/Btotal * Bi/Ai+Bi				Date	Ai	Bi	Ai/Atotal	Bi/Btotal	Ai/Bi+Ai	Bi/Ai+Bi	Ai/Atotal * Bi/Ai+Bi	Ai/Atotal * Ai/Bi+Ai	Bi/Btotal * Ai/Bi+Ai	Bi/Btotal * Bi/Ai+Bi					Ai	Bi	Ai/Atotal	Bi/Btotal	Ai/Bi+Ai	Bi/Ai+Bi	Ai/Atotal * Bi/Ai+Bi	Ai/Atotal * Ai/Bi+Ai	Bi/Btotal * Ai/Bi+Ai	Bi/Btotal * Bi/Ai+Bi
2020	Oct	0	0	0	0	#DIV/0!	#DIV/0!							2020	Oct	0	0	0	0	#DIV/0!	#DIV/0!							2020	Oct	0	0	0	0	#DIV/0!	#DIV/0!
2020	Oct	0	0	0	0	#DIV/0!	#DIV/0!							2020	Oct	0	0	0	0	#DIV/0!	#DIV/0!							2020	Oct	0	0	0	0	#DIV/0!	#DIV/0!
2020	Nov	0	0	0	0	#DIV/0!	#DIV/0!							2020	Nov	0	0	0	0	#DIV/0!	#DIV/0!							2020	Nov	0	0	0	0	#DIV/0!	#DIV/0!
2020	Nov	0	0	0	0	#DIV/0!	#DIV/0!							2020	Nov	0	0	0	0	#DIV/0!	#DIV/0!							2020	Nov	0	0	0	0	#DIV/0!	#DIV/0!
2020	Dec	0	0	0	0	#DIV/0!	#DIV/0!							2020	Dec	0	0	0	0	#DIV/0!	#DIV/0!							2020	Dec	0	0	0	0	#DIV/0!	#DIV/0!
2020	Dec	0	0	0	0	#DIV/0!	#DIV/0!							2020	Dec	0	0	0	0	#DIV/0!	#DIV/0!							2020	Dec	0	0	0	0	#DIV/0!	#DIV/0!
2021	Jan	0	0	0	0	#DIV/0!	#DIV/0!							2021	Jan	0	0	0	0	#DIV/0!	#DIV/0!							2021	Jan	0	0	0	0	#DIV/0!	#DIV/0!
2021	Jan	11	4	0.0650888	0.0289855	0.733333	0.266667	0.017357	0.0477318	0.021256	0.00772947			2021	Jan	11	0	0.0650888	0	1	0	0	0.0650888	0	0			2021	Jan	11	0	0.0650888	0	1	0	0	0.0650888	0	0
2021	Feb	5	9	0.0295858	0.0652174	0.357143	0.642857	0.0190194	0.0105664	0.0232919	0.0419255			2021	Feb	5	0	0.0295858	0	1	0	0	0.0295858	0	0			2021	Feb	5	0	0.0295858	0	1	0	0	0.0295858	0	0
2021	Feb	17	7	0.100592	0.0507246	0.708333	0.291667	0.0293393	0.0712525	0.03593	0.0147947			2021	Feb	17	55	0.100592	0.145503	0.236111	0.763889	0.0768409	0.0237508	0.0343548	0.111148			2021	Feb	17	0	0.100592	0	1	0	0	0.100592	0	0
2021	Mar	27	27	0.159763	0.195652	0.5	0.5	0.0798817	0.0798817	0.0978261	0.0978261			2021	Mar	27	125	0.159763	0.330688	0.177632	0.822368	0.131384	0.028379	0.0587406	0.271947			2021	Mar	27	0	0.159763	0	1	0	0	0.159763	0	0
2021	Mar	13	14	0.0769231	0.101449	0.481481	0.518519	0.039886	0.037037	0.0488459	0.0526033			2021	Mar	13	0	0.0769231	0	1	0	0	0.0769231	0	0			2021	Mar	13	0	0.0769231	0	1	0	0	0.0769231	0	0
2021	Apr	31	14	0.183432	0.101449	0.688889	0.311111	0.0570677	0.126364	0.0698873	0.031562			2021	Apr	31	164	0.183432	0.433862	0.158974	0.841026	0.154271	0.029161	0.068973	0.364889			2021	Apr	31	0	0.183432	0	1	0	0	0.183432	0	0
2021	Apr	24	51	0.142012	0.369565	0.32	0.68	0.096568	0.0454438	0.118261	0.251304			2021	Apr	24	34	0.142012	0.0899471	0.413793	0.586207	0.0832483	0.0587635	0.0372195	0.0527276			2021	Apr	24	7	0.142012	0.0191257	0.774194	0.225806	0.0320672	0.109945	0.014807	0.0043187
2021	May	21	12	0.12426	0.0869565	0.636364	0.363636	0.0451856	0.0790748	0.055336	0.0316206			2021	May	21	0	0.12426	0	1	0	0	0.12426	0	0			2021	May	21	2	0.12426	0.00546448	0.913043	0.0869565	0.0108052	0.113455	0.00498931	0.000475172
2021	May	16	0	0.0946746	0	1	0	0	0.0946746	0	0			2021	May	16	0	0.0946746	0	1	0	0	0.0946746	0	0			2021	May	16	0	0.0946746	0	1	0	0	0.0946746	0	0
2021	Jun	2	0	0.0118343	0	1	0	0	0.0118343	0	0			2021	Jun	2	0	0.0118343	0	1	0	0	0.0118343	0	0			2021	Jun	2	39	0.0118343	0.106557	0.0487805	0.95122	0.011257	0.000577284	0.00519792	0.101359
2021	Jun	2	0	0.0118343	0	1	0	0	0.0118343	0	0			2021	Jun	2	0	0.0118343	0	1	0	0	0.0118343	0	0			2021	Jun	2	162	0.0118343	0.442623	0.0121951	0.987805	0.01169	0.000144321	0.00539784	0.437225
2021	Jul	0	0	0	0	#DIV/0!	#DIV/0!							2021	Jul	0	0	0	0	#DIV/0!	#DIV/0!							2021	Jul	0	2	0	0.00546448	0	1	0	0	0	0.00546448
2021	Jul	0	0	0	0	#DIV/0!	#DIV/0!							2021	Jul	0	0	0	0	#DIV/0!	#DIV/0!							2021	Jul	0	154	0	0.420765	0	1	0	0	0	0.420765
2021	Ago	0	0	0	0	#DIV/0!	#DIV/0!							2021	Ago	0	0	0	0	#DIV/0!	#DIV/0!							2021	Ago	0	0	0	0	#DIV/0!	#DIV/0!
2022	Ago	0	0	0	0	#DIV/0!	#DIV/0!							2021	Ago	0	0	0	0	#DIV/0!	#DIV/0!							2021	Ago	0	0	0	0	#DIV/0!	#DIV/0!
		169	138													169	378													169	366
		Atotal	Btotal				observed	0.384305	0.615695	0.470634	0.529366					Atotal	Btotal				observed	0.445744	0.554256	0.199288	0.800712					Atotal	Btotal				observed	0.0658195	0.934181	0.0303921	0.969608
	Total	307													Total	547													Total	535
					0.854939		0.854939												0.645032		0.645032												0.0962115		0.0962115
Btotal/(Atotal+Btotal)		0.449511			1.11845		1.17765							Btotal/(Atotal+Btotal)		0.691042			1.79395		1.1587							Btotal/(Atotal+Btotal)		0.684112			2.95732		1.41732
Atotal/(Btotal+Atotal)		0.550489			0.866467		0.841233							Atotal/(Btotal+Atotal)		0.308958			0.528935		0.715219							Atotal/(Btotal+Atotal)		0.315888			0.0630166		0.127135
				Strength W. ampla (A)	0.133533	Strength W. subsecunda (B)	0.158767											Strength W. ampla (A)	0.471065	Strength W. pedicellata (B)	0.284781											Strength W. ampla (A)	0.936983	Strength W. nephrolepis (B)	0.872865
		Sobel & Cheng, 2014														Sobel & Cheng, 2014
Year	Date	W. subsecunda (A)	W. nephrolepis (B)	Prop. Of A open on ith day	Prop. Of B open on ith day	Fraction of flowers open on ith day that are species A	Fraction of flowers open on ith day that are species B	Overlap A	Sobel	Overlap B	Sobel			Year	Date	W. subsecunda (A)	W. pedicellata (B)	Prop. Of A open on ith day	Prop. Of B open on ith day	Fraction of flowers open on ith day that are species A	Fraction of flowers open on ith day that are species B	Overlap A	Sobel	Overlap B	Sobel
		Ai	Bi	Ai/Atotal	Bi/Btotal	Ai/Bi+Ai	Bi/Ai+Bi	Ai/Atotal * Bi/Ai+Bi	Ai/Atotal * Ai/Bi+Ai	Bi/Btotal * Ai/Bi+Ai	Bi/Btotal * Bi/Ai+Bi					Ai	Bi	Ai/Atotal	Bi/Btotal	Ai/Bi+Ai	Bi/Ai+Bi	Ai/Atotal * Bi/Ai+Bi	Ai/Atotal * Ai/Bi+Ai	Bi/Btotal * Ai/Bi+Ai	Bi/Btotal * Bi/Ai+Bi
2020	Oct	0	0	0	0	#DIV/0!	#DIV/0!							2020	Oct	0	0	0	0	#DIV/0!	#DIV/0!
2020	Oct	0	0	0	0	#DIV/0!	#DIV/0!							2020	Oct	0	0	0	0	#DIV/0!	#DIV/0!
2020	Nov	0	0	0	0	#DIV/0!	#DIV/0!							2020	Nov	0	0	0	0	#DIV/0!	#DIV/0!
2020	Nov	0	0	0	0	#DIV/0!	#DIV/0!							2020	Nov	0	0	0	0	#DIV/0!	#DIV/0!
2020	Dec	0	0	0	0	#DIV/0!	#DIV/0!							2020	Dec	0	0	0	0	#DIV/0!	#DIV/0!
2020	Dec	0	0	0	0	#DIV/0!	#DIV/0!							2020	Dec	0	0	0	0	#DIV/0!	#DIV/0!
2021	Jan	0	0	0	0	#DIV/0!	#DIV/0!							2021	Jan	0	0	0	0	#DIV/0!	#DIV/0!
2021	Jan	4	0	0.0289855	0	1	0	0	0.0289855	0	0			2021	Jan	4	0	0.0289855	0	1	0	0	0.0289855	0	0
2021	Feb	9	0	0.0652174	0	1	0	0	0.0652174	0	0			2021	Feb	9	0	0.0652174	0	1	0	0	0.0652174	0	0
2021	Feb	7	0	0.0507246	0	1	0	0	0.0507246	0	0			2021	Feb	7	55	0.0507246	0.145503	0.112903	0.887097	0.0449977	0.00572698	0.0164277	0.129075
2021	Mar	27	0	0.195652	0	1	0	0	0.195652	0	0			2021	Mar	27	125	0.195652	0.330688	0.177632	0.822368	0.160898	0.034754	0.0587406	0.271947
2021	Mar	14	0	0.101449	0	1	0	0	0.101449	0	0			2021	Mar	14	0	0.101449	0	1	0	0	0.101449	0	0
2021	Apr	14	0	0.101449	0	1	0	0	0.101449	0	0			2021	Apr	14	164	0.101449	0.433862	0.0786517	0.921348	0.0934701	0.00797916	0.034124	0.399738
2021	Apr	51	7	0.369565	0.0191257	0.87931	0.12069	0.0446027	0.324963	0.0168174	0.00230827			2021	Apr	51	34	0.369565	0.0899471	0.6	0.4	0.147826	0.221739	0.0539683	0.0359788
2021	May	12	2	0.0869565	0.00546448	0.857143	0.142857	0.0124224	0.0745342	0.00468384	0.00078064			2021	May	12	0	0.0869565	0	1	0	0	0.0869565	0	0
2021	May	0	0	0	0	#DIV/0!	#DIV/0!							2021	May	0	0	0	0	#DIV/0!	#DIV/0!
2021	Jun	0	39	0	0.106557	0	1	0	0	0	0.106557			2021	Jun	0	0	0	0	#DIV/0!	#DIV/0!
2021	Jun	0	162	0	0.442623	0	1	0	0	0	0.442623			2021	Jun	0	0	0	0	#DIV/0!	#DIV/0!
2021	Jul	0	2	0	0.00546448	0	1							2021	Jul	0	0	0	0	#DIV/0!	#DIV/0!
2021	Jul	0	154	0	0.420765	0	1	0	0	0	0.420765			2021	Jul	0	0	0	0	#DIV/0!	#DIV/0!
2021	Ago	0	0	0	0	#DIV/0!	#DIV/0!							2021	Ago	0	0	0	0	#DIV/0!	#DIV/0!
2021	Ago	0	0	0	0	#DIV/0!	#DIV/0!							2021	Ago	0	0	0	0	#DIV/0!	#DIV/0!
		138	366	1	1											138	378
		Atotal	Btotal				observed	0.0570251	0.942975	0.0215013	0.973034					Atotal	Btotal				observed	0.447192	0.552808	0.163261	0.836739
	Total	504													Total	516
					0.0785263		0.0785263												0.610453		0.610453
Btotal/(Atotal+Btotal)		0.72619			3.44391		1.33992							Btotal/(Atotal+Btotal)		0.732558			2.06702		1.14222
Atotal/(Btotal+Atotal)		0.27381			0.0445864		0.110722							Atotal/(Btotal+Atotal)		0.267442			0.455991		0.696598
				Strength W. subsecunda (A)	0.955414	Strength W. nephrolepis (B)	0.889278											Strength W. subsecunda (A)	0.544009	Strength W. pedicellata (B)	0.303402
		Sobel & Cheng, 2014
Year	Date	W. pedicellata (A)	W. nephrolepis (B)	Prop. Of A open on ith day	Prop. Of B open on ith day	Fraction of flowers open on ith day that are species A	Fraction of flowers open on ith day that are species B	Overlap A	Sobel	Overlap B	Sobel
		Ai	Bi	Ai/Atotal	Bi/Btotal	Ai/Bi+Ai	Bi/Ai+Bi	Ai/Atotal * Bi/Ai+Bi	Ai/Atotal * Ai/Bi+Ai	Bi/Btotal * Ai/Bi+Ai	Bi/Btotal * Bi/Ai+Bi
2020	Oct	0	0	0	0	#DIV/0!	#DIV/0!
2020	Oct	0	0	0	0	#DIV/0!	#DIV/0!
2020	Nov	0	0	0	0	#DIV/0!	#DIV/0!
2020	Nov	0	0	0	0	#DIV/0!	#DIV/0!
2020	Dec	0	0	0	0	#DIV/0!	#DIV/0!
2020	Dec	0	0	0	0	#DIV/0!	#DIV/0!
2021	Jan	0	0	0	0	#DIV/0!	#DIV/0!
2021	Jan	0	0	0	0	#DIV/0!	#DIV/0!
2021	Feb	0	0	0	0	#DIV/0!	#DIV/0!
2021	Feb	55	0	0.145503	0	1	0	0	0.145503	0	0
2021	Mar	125	0	0.330688	0	1	0	0	0.330688	0	0
2021	Mar	0	0	0	0	#DIV/0!	#DIV/0!
2021	Apr	164	0	0.433862	0	1	0	0	0.433862	0	0
2021	Apr	34	7	0.0899471	0.0191257	0.829268	0.170732	0.0153568	0.0745903	0.0158603	0.00326536
2021	May	0	2	0	0.00546448	0	1	0	0	0	0.00546448
2021	May	0	0	0	0	#DIV/0!	#DIV/0!
2021	Jun	0	39	0	0.106557	0	1	0	0	0	0.106557
2021	Jun	0	162	0	0.442623	0	1	0	0	0	0.442623
2021	Jul	0	2	0	0.00546448	0	1	0	0	0	0.00546448
2021	Jul	0	154	0	0.420765	0	1	0	0	0	0.420765
2021	Ago	0	0	0	0	#DIV/0!	#DIV/0!
2021	Ago	0	0	0	0	#DIV/0!	#DIV/0!
		378	366
		Atotal	Btotal				observed	0.0153568	0.984643	0.0158603	0.98414
	Total	744
					0.0312171		0.0312171
Btotal/(Atotal+Btotal)		0.491935			1.93803		2.00055
Atotal/(Btotal+Atotal)		0.508065			0.0317047		0.0307291
				Strength W. pedicellata (A)	0.968295	Strength W. nephrolepis (B)	0.969271

## Sheet: RI mechanical-floral size
Species	Corolla length (mm)	Corolla aperture width (mm)	Stamen length (mm)	Pistil length (mm)	Reproductive structures (position)
W. ampla	50.2	20.1	56	50.5	dorsal			Etiquetas de fila	Promedio de Corolla length (mm)	Desvest de Corolla length (mm)	Promedio de Corolla aperture width (mm)	Desvest de Corolla aperture width (mm)	Promedio de Stamen length (mm)	Desvest de Stamen length (mm)	Mín. de Stamen length (mm)	Máx. de Stamen length (mm)	Promedio de Pistil length (mm)	Desvest de Pistil length (mm)
W. ampla	55	17.5	50	52	dorsal			W. ampla	62.8067	8.01232	29.7867	6.65374	61.5667	5.74566	47	70	60.2	5.34757
W. ampla	45	27.5	47	52	dorsal			W. nephrolepis	48.9677	2.45607	26.3226	2.13911	46.4516	2.39219	41	51	43.4194	2.47352
W. ampla	50	37.5	60	55	dorsal			W. pedicellata	25.21	1.95789	17.9583	2.22842	21.7	1.41787	19	24	21.0833	2.13785
W. ampla	50	18.5	48	53	dorsal			W. subsecunda	29.1355	2.20054	11.7419	2.0057	24.921	4.11363	5	30	24.129	2.14075
W. ampla	50	16.5	60	56	dorsal			Total general	41.4893	15.8368	21.4127	8.02583	38.6111	16.7132	5	70	37.1516	16.1195
W. ampla	60	18.5	55	55	dorsal
W. ampla	68	30	63	66	dorsal
W. ampla	60	37.5	65	69	dorsal
W. ampla	70	28.5	65	60	dorsal
W. ampla	62	35.5	65	63	dorsal
W. ampla	65	31	60	59	dorsal
W. ampla	60	33.5	60	64	dorsal
W. ampla	67	37.5	60	55	dorsal
W. ampla	70	30	66	63	dorsal
W. ampla	68	35	65	60	dorsal
W. ampla	70	27.5	65	63	dorsal
W. ampla	65	30	65	59	dorsal
W. ampla	60	40	67	60	dorsal
W. ampla	70	25	65	65	dorsal
W. ampla	70	27.5	66	66	dorsal
W. ampla	60	25	58	50	dorsal
W. ampla	75	36	70	67	dorsal
W. ampla	65	28	61	63	dorsal
W. ampla	66	35	64	66	dorsal
W. ampla	75	31	70	65	dorsal
W. ampla	70	30	65	60	dorsal
W. ampla	70	33	60	63	dorsal
W. ampla	57	31	65	63	dorsal
W. ampla	61	40	61	63.5	dorsal
W. pedicellata	25	17.5	20	22	dorsal
W. pedicellata	24	17.5	22	23.5	dorsal
W. pedicellata	24	18.5	23	24.5	dorsal
W. pedicellata	24	18	24	25.5	dorsal
W. pedicellata	25	17.5	19	20.5	dorsal
W. pedicellata	25	16	22	24.5	dorsal
W. pedicellata	24	16	20	21.5	dorsal
W. pedicellata	27	15.5	21	22.5	dorsal
W. pedicellata	28	18.5	24	25.5	dorsal
W. pedicellata	27	18.75	24	24	dorsal
W. pedicellata	27	16	24	20	dorsal
W. pedicellata	26	16	22	22	dorsal
W. pedicellata	25	12	21	20	dorsal
W. pedicellata	27	16	21	20	dorsal
W. pedicellata	26	22.5	22	21	dorsal
W. pedicellata	24	16.5	21	18	dorsal
W. pedicellata	28	17	24	21.5	dorsal
W. pedicellata	26	19	22	20	dorsal
W. pedicellata	22	20.5	22	20	dorsal
W. pedicellata	24	20.5	22	20	dorsal
W. pedicellata	23	18.5	21	18.5	dorsal
W. pedicellata	24	18.5	21	20	dorsal
W. pedicellata	26	20	21	20	dorsal
W. pedicellata	24	22	20	18	dorsal
W. pedicellata	25	19	23	21	dorsal
W. pedicellata	29	18.5	23	21.5	dorsal
W. pedicellata	25	17.5	21	20	dorsal
W. pedicellata	26	16	20	19	dorsal
W. pedicellata	27	17	21	20	dorsal
W. pedicellata	19.3	22	20	18	dorsal
W. subsecunda	28	12.5	24	19	lateral
W. subsecunda	30	12.5	28	25.5	lateral
W. subsecunda	31	12	25	23	lateral
W. subsecunda	27	12.5	24	21	lateral
W. subsecunda	27	10	26.05	25	lateral
W. subsecunda	29.5	11	27	26.5	lateral
W. subsecunda	30	13.75	5	27	lateral
W. subsecunda	31.2	13.5	27	24	lateral
W. subsecunda	30	12.5	26	24	lateral
W. subsecunda	31	13.5	28	27	lateral
W. subsecunda	28	16	25	25	lateral
W. subsecunda	28.5	11.5	25	24	lateral
W. subsecunda	29	13.5	28	26.5	lateral
W. subsecunda	30	11.75	27.5	25	lateral
W. subsecunda	26.5	12	23	21	lateral
W. subsecunda	30	13	24	23	lateral
W. subsecunda	28	14.25	22	20.5	lateral
W. subsecunda	28	9.5	24.5	22.5	lateral
W. subsecunda	31	15	26	23	lateral
W. subsecunda	29	12.5	26	23.5	lateral
W. subsecunda	25	12.5	23	22.5	lateral
W. subsecunda	29.5	12.5	27.5	23	lateral
W. subsecunda	33	13	30	28	lateral
W. subsecunda	27	9.5	23	22.5	lateral
W. subsecunda	30	9.5	25	23	lateral
W. subsecunda	32	8.5	26	24	lateral
W. subsecunda	22	9	25	26	lateral
W. subsecunda	30	9.25	26	27	lateral
W. subsecunda	31	10	27	25	lateral
W. subsecunda	30	8	24	25	lateral
W. subsecunda	31	9.5	25	26	lateral
W. nephrolepis	48	28	46	45	dorsal
W. nephrolepis	49	25	41	43	dorsal
W. nephrolepis	50	25	44	42	dorsal
W. nephrolepis	50	21	46	44	dorsal
W. nephrolepis	48	25.5	47	45	dorsal
W. nephrolepis	52	25.5	48	46	dorsal
W. nephrolepis	48	27.5	46	41	dorsal
W. nephrolepis	55	29.5	48	43	dorsal
W. nephrolepis	48	28.5	45	42	dorsal
W. nephrolepis	48	27	46	42	dorsal
W. nephrolepis	43	20	42	38	dorsal
W. nephrolepis	50	25	47	42	dorsal
W. nephrolepis	51	25	49	46	dorsal
W. nephrolepis	51	27	48	46	dorsal
W. nephrolepis	52	26	50	47	dorsal
W. nephrolepis	48	27	45	41	dorsal
W. nephrolepis	52	24.5	51	47	dorsal
W. nephrolepis	49	26.5	48	44	dorsal
W. nephrolepis	49	25	48	44	dorsal
W. nephrolepis	44	26	43	40	dorsal
W. nephrolepis	50	27.5	48	45	dorsal
W. nephrolepis	48	29	47	43	dorsal
W. nephrolepis	46	28	44	42	dorsal
W. nephrolepis	50	27.5	48	44	dorsal
W. nephrolepis	50	30.5	49	46	dorsal
W. nephrolepis	45	26	43	37	dorsal
W. nephrolepis	50	26.5	48	44	dorsal
W. nephrolepis	51	27.5	48	46	dorsal
W. nephrolepis	48	27.5	47	45	dorsal
W. nephrolepis	48	25	47	45	dorsal
W. nephrolepis	47	26.5	43	41	dorsal

## Sheet: RI incompat. and Hybrid progeny
Pollen receptor	Plant	Flower	Pollen donor	Plant	Flower	Fruit development	Seeds
W. ampla	1	2	W. subsecunda	1	4	0	-
W. ampla	2	2	W. subsecunda	3	6	0	-
W. ampla	4	15	W. subsecunda	13-A	5	0	-							Etiquetas de columna
W. ampla	4	16	W. pedicellata	2	20.1	0	-							W. ampla		W. pedicellata		W. subsecunda		Total Cuenta de Flower	Total Suma de Fruit development
W. ampla	4	18	W. pedicellata	4	18.1	0	-						Etiquetas de fila	Cuenta de Flower	Suma de Fruit development	Cuenta de Flower	Suma de Fruit development	Cuenta de Flower	Suma de Fruit development
W. ampla	4	20	W. subsecunda	15	1	0	-						W. ampla	17	14	25	0	29	0	71	14
W. ampla	6	11	W. subsecunda	12	6	0	-						W. pedicellata	22	0	31	18	23	11	76	29
W. ampla	7	2	W. subsecunda	12	5	0	-						W. subsecunda	33	18	27	10	17	13	77	41
W. ampla	7	3	W. subsecunda	13-A	1	0	-						Total general	72	32	83	28	69	24	224	84
W. ampla	7	7	W. pedicellata	2	7.1	0	-
W. ampla	8	6	W. pedicellata	1	9.1	0	-
W. ampla	8	8	W. pedicellata	3	6.1	0	-
W. ampla	8	12	W. pedicellata	5	11.1	0	-						Interespecific incompatibility summary
W. ampla	10	3	W. pedicellata	1	12.2	0	-
W. ampla	10	4	W. pedicellata	3	12.1	0	-						Donor Receptor	Plants		W. ampla		Plants		W. subsecunda		Plants		W. pedicellata		Plants (general)
W. ampla	11	1	W. pedicellata	3	5.2	0	-							N	Flowers	Fruits	%	N	Flowers	Fruits	%	N	Flowers	Fruits	%
W. ampla	11	7	W. subsecunda	16-A	1	0	-						W. ampla	12	17	14	82.3529	18	29	0	0	13	25	0	0	18
W. ampla	12	1	W. subsecunda	19	2	0	-						W. nephrolepis	-	-	-	-	-	-	-	-	-	-	-	-	-
W. ampla	12	2	W. subsecunda	9-B	6	0	-						W. pedicellata	14	22	0	0	13	23	11	47.8261	9	31	18	58.0645	19
W. ampla	13	3	W. subsecunda	18	2	0	-						W. subsecunda	22	33	18	54.5455	15	17	13	76.4706	13	27	10	37.037	29
W. ampla	13	6	W. subsecunda	9-B	7	0	-
W. ampla	14	1	W. subsecunda	19	3	0	-
W. ampla	15	1	W. subsecunda	20	5	0	-						Calculation of Interspecific Incompatibility Index (RII) using the method proposed in Sobel and Chen (2014).
W. ampla	9-A	4	W. subsecunda	14	4	0	-
W. ampla	9-A	6	W. pedicellata	4	1.1	0	-						Individual barrier not affecting co-occurrence – prezygotic :
W. ampla	9-B	3	W. pedicellata	2	21.1	0	-
W. ampla	9-C	3	W. pedicellata	1	19.1	0	-							W. ampla x W. pedicellata	W. ampla x W. subsecunda	W. pedicellata x W. ampla	W. pedicella x W. subsecunda	W. subsecunda x W. ampla	W. subsecunda x W. pedicellata
W. ampla	9-C	4	W. subsecunda	14	5	0	-						input C here as the observed freq of conspecific matings as affected by focal barrier ->	82.4	82.4	58.1	58.1	76.5	76.5
W. ampla	9-C	7	W. pedicellata	8	13.1	0	-						input H here as the observed freq of heterospecific matings as affected by focal barrier ->	0	0	0	47.83	54.5	37
W. pedicellata	1	12.2	W. ampla	10	3	0	-
W. pedicellata	1	19.1	W. ampla	9-C	3	0	-							expected values	expected values	expected values	expected values	expected values	expected values
W. pedicellata	2	7.1	W. ampla	7	7	0	-						when null departs from equality, input C here as the expected conspecific mating. If expected H and C are equal under null, retain 0.5 ->	0.5	0.5	0.5	0.5	0.5	0.5
W. pedicellata	2	20.1	W. ampla	4	16	0	-						when null departs from equality, input H here as the expected heterospecific mating. If expected H and C are equal under null, retain 0.5 ->	0.5	0.5	0.5	0.5	0.5	0.5
W. pedicellata	2	21.1	W. ampla	9-B	3	0	-
W. pedicellata	3	5.2	W. ampla	11	1	0	-						RI interespecific incompatibility =	1	1	1	0.0969508	0.167939	0.348018	this value is calculated using equation RI4A (or RI4G when expected values are unequal)
W. pedicellata	3	6.1	W. ampla	8	8	0	-
W. pedicellata	3	12.1	W. ampla	10	4	0	-
W. pedicellata	4	18.1	W. ampla	4	18	0	-
W. pedicellata	5	11.1	W. ampla	8	12	0	-
W. subsecunda	1	4	W. ampla	1	2	1
W. subsecunda	3	6	W. ampla	2	2	0	-
W. subsecunda	5	5	W. ampla	6	5	1								Pollen donor	Values
W. subsecunda	12	5	W. ampla	7	2	0	-							W. ampla		W. pedicellata		W. subsecunda		Total Promedio de Seeds	Total Promedio de Seeds
W. subsecunda	12	6	W. ampla	6	11	0	-						Pollen receptor	Promedio de Seeds	Promedio de Seeds	Promedio de Seeds	Promedio de Seeds	Promedio de Seeds	Promedio de Seeds
W. subsecunda	14	4	W. ampla	9-A	4	0	-						W. ampla			#DIV/0!	#DIV/0!	#DIV/0!	#DIV/0!	#DIV/0!	#DIV/0!
W. subsecunda	14	5	W. ampla	9-C	4	1	232						W. pedicellata	#DIV/0!	#DIV/0!			152.125	76.4095	152.125	76.4095
W. subsecunda	15	1	W. ampla	11	7	1	251						W. subsecunda	213.812	84.4592	330.4	182.216			258.654	139.925
W. subsecunda	18	2	W. ampla	13	3	1	173						Total general	213.812	84.4592	330.4	182.216	152.125	76.4095	233.588	134.814
W. subsecunda	19	2	W. ampla	12	1	0	-
W. subsecunda	19	3	W. ampla	14	1	1	202
W. subsecunda	20	5	W. ampla	15	1	0	-						Calculation of Hybrid progeny (seed production) Index (RIs) using the method proposed in Sobel and Chen (2014).
W. subsecunda	20	5	W. ampla	15	1	1	59
W. subsecunda	13-A	1	W. ampla	7	3	1	131						Individual barrier not affecting co-occurrence - postzygotic
W. subsecunda	16-A	1	W. ampla	11	7	0	-
W. subsecunda	9-B	6	W. ampla	12	2	0	-							W. pedicella x W. subsecunda	W. subsecunda x W. ampla	W. subsecunda x W. pedicellata
W. subsecunda	9-B	7	W. ampla	13	5	0	-						input C here as the observed fitness of conspecific offspring as affected by focal barrier ->	367	636.4	636.4
W. subsecunda	22A_21	5	W. ampla	10B	5	0	-						input H here as the observed fitness of heterospecific offspring as affected by focal barrier ->	152.1	213.8	330.4
W. ampla	10A_20	3	W. pedicellata	4	3.3	0	-
W. ampla	10B_20	5	W. subsecunda	22A	5	0	-
W. pedicellata	08_20	1.1	W. ampla	5	4	0	-						RI seed production =	0.413986	0.49706	0.316508	this value is calculated using equation RI4A
W. pedicellata	04_20	3.3	W. ampla	10A	3	0	-
W. ampla	05_20	4	W. pedicellata	8	1.1	0	-
W. subsecunda	23_21	1	W. ampla	16_2021	10	1	255
W. ampla	16_21	10	W. subsecunda	23_2021	1	0	-
W. subsecunda	24_21	3	W. ampla	10A	4	0	-
W. ampla	10A_20	4	W. subsecunda	24_2021	3	0	-
W. pedicellata	17_21	12.3	W. ampla	10B	6	0	-
W. ampla	10B_20	6	W. pedicellata	17_2021	12.3	0	-
W. pedicellata	19_21	3.2	W. ampla	5	4	0	-
W. ampla	05_20	5	W. pedicellata	19_2021	3.2	0	-
W. pedicellata	04_20	19.2	W. subsecunda	23	2	0	-
W. subsecunda	23_21	2	W. pedicellata	04_2021	19.2	0	-
W. ampla	16_21	11	W. subsecunda	22_2021	7	0	-
W. subsecunda	22A_21	7	W. ampla	16_2021	11	0	-
W. ampla	10A_20	7	W. pedicellata	08_20	9.2	0	-
W. ampla	05_20	8	W. subsecunda	23	14	0	-
W. subsecunda	23_21	4	W. ampla	5	18	1	59
W. pedicellata	08_20	9.2	W. ampla	10A	7	0	-
W. ampla	16_21	12	W. pedicellata	17_21	27.2	0	-
W. pedicellata	17_21	21.2	W. ampla	16	12	0	-
W. subsecunda	23_21	5	W. ampla	10B	9	1	188
W. ampla	05_20	9	W. subsecunda	24	6	0	-
W. ampla	10B_20	9	W. subsecunda	23	5	0	-
W. subsecunda	24_21	6	W. ampla	5	9	1	299
W. subsecunda	22A_21	9	W. pedicellata	23_21	22.3	0	-
W. pedicellata	23_21	22.3	W. subsecunda	22A	9	1
W. subsecunda	26_21	2	W. ampla	5	10	1	380
W. ampla	05_20	10	W. subsecunda	26	2	0	-
W. subsecunda	22A_21	10	W. pedicellata	21_21	15.3	0	-
W. subsecunda	22B_21	1	W. pedicellata	08_20	marca	1	258
W. subsecunda	25_21	3	W. pedicellata	22_21	19.5	1	427
W. pedicellata	21_21	15.3	W. subsecunda	22A_21	10	1	177
W. pedicellata	22_21	19.1	W. subsecunda	25_21	3	1
W. pedicellata	08_20	marca	W. subsecunda	22B_21	1	0	-
W. subsecunda	23_21	7	W. pedicellata	24_21	10.1	1	78
W. ampla	05_20	11	W. pedicellata	23_21	36.2	0	-
W. ampla	10A_20	10	W. pedicellata	25_21	18.2	0	-
W. pedicellata	24_21	10.1	W. subsecunda	23	7	1	100
W. pedicellata	23_21	36.2	W. ampla	05_20	11	0	-
W. pedicellata	25_21	18.2	W. ampla	10A_20	10	0	-
W. subsecunda	23_21	8	W. pedicellata	23_21	marca	0	-
W. subsecunda	26_21	5	W. pedicellata	25_21	marca	1	450
W. subsecunda	22B_21	5	W. pedicellata	24_21	marca	1	293
W. pedicellata	23_21	marca	W. subsecunda	23_21	8	0	-
W. pedicellata	25_21	marca	W. subsecunda	26_21	5	1
W. pedicellata	24_21	marca	W. subsecunda	22B_21	5	1	143
W. ampla	16_21	17	W. subsecunda	26_21	7	0	-
W. subsecunda	26_21	7	W. ampla	16_21	17	1	228
W. subsecunda	22B_21	8	W. pedicellata	26_marcada	marca	0	-
W. pedicellata	26_21	marca	W. subsecunda	22B_21	8	0	-
W. ampla	04_20	4	W. subsecunda	27_21	1	0	-
W. subsecunda	27_21	1	W. ampla	04_20	4	1	215
W. ampla	04_20	7	W. pedicellata	28_21	marca	0	-
W. subsecunda	27_21	5	W. pedicellata	29_21	marca	0	-
W. pedicellata	28_21	marca	W. ampla	04_20	7	0	-
W. pedicellata	29_21	marca	W. subsecunda	27_21	5	1	117
W. subsecunda	27_21	8	W. pedicellata	28_21	marca	0	-
W. pedicellata	28_21	marca-punto	W. subsecunda	27_21	8	1	200
W. subsecunda	27_21	9	W. pedicellata	30_21	marca	0	-
W. ampla	04_20	11	W. pedicellata	28_21	marca	0	-
W. pedicellata	28_21	marca	W. ampla	04_20	11	0	-
W. subsecunda	11_20	6	W. pedicellata	31_21	rojo2	0	-
W. pedicellata	31_21	rojo2	W. subsecunda	11_20	6	1	308
W. subsecunda	28_21	1	W. pedicellata	30_21	azul2	0	-
W. subsecunda	29A_21	1	W. pedicellata	30_21	azul1	0	-
W. subsecunda	30_21	2	W. pedicellata	28_21	rojo, cable naranja	0	-
W. pedicellata	28_21	rojo, cable naranja	W. subsecunda	30_21	2	0	-
W. ampla	04_20	12	W. pedicellata	31_21	azul	0	-
W. pedicellata	31_21	azul	W. ampla	04_20	12	0	-
W. subsecunda	31_21	2	W. pedicellata	32_21	azul	0	-
W. pedicellata	32_21	azul	W. subsecunda	31_21	2	0	-
W. subsecunda	29B_21	1	W. pedicellata	32_21	roja	1	475
W. pedicellata	32_21	roja	W. subsecunda	29B_21	1	0	-
W. subsecunda	32_21	3	W. pedicellata	31_21	verde	1	597
W. pedicellata	31_21	verde	W. subsecunda	32_21	3	1	107
W. subsecunda	31_21	4	W. pedicellata	33_21	azul	0	-
W. pedicellata	33_21	azul	W. subsecunda	31_21	4	1	65
W. subsecunda	29B_21	2	W. pedicellata	33_21	rojo	0	-
W. subsecunda	32_21	4	W. pedicellata	32_21	verde	1	0
W. pedicellata	32_21	verde	W. subsecunda	32_21	4	0	-
W. subsecunda	31_21	5	W. pedicellata	32_21	rojo1	0	-
W. pedicellata	32_21	rojo1	W. subsecunda	31_21	5	0	-
W. subsecunda	29B_21	3	W. pedicellata	33_21	azul3	1	391
W. pedicellata	33_21	azul3	W. subsecunda	29B_21	3	0	-
W. subsecunda	32_21	6	W. pedicellata	32_21	azul2	1	335
W. pedicellata	32_21	azul2	W. subsecunda	32_21	6	0	-
W. subsecunda	30_21	6	W. pedicellata	33_21	verde	0	-
W. pedicellata	33_21	verde	W. subsecunda	30_21	6	0	-
W. ampla	04_20	15	W. pedicellata	33_21	azul2	0	-
W. pedicellata	33_21	azul2	W. ampla	04_20	15	0	-
W. subsecunda	32_21	7	W. ampla	15_20	1	0	-
W. subsecunda	34_21	1	W. ampla	04_20	16	0	-
W. ampla	04_20	16	W. subsecunda	34_21	1	0	-
W. subsecunda	29B_21	5	W. ampla	15B_21	1	0	-
W. subsecunda	33B_21	4	W. ampla	04_20	17	1	261
W. subsecunda	33A_21	4	W. ampla	15A_21	2	1	184
W. ampla	04_20	17	W. subsecunda	33B_21	4	0	-
W. subsecunda	33A_21	5	W. ampla	08A_20	3	1	304
W. ampla	08A_20	3	W. subsecunda	33_21	5	0	-
W. ampla	2	15	W. ampla	3	10	1	1030
W. ampla	3	6	W. ampla	5	4	1	2466
W. ampla	4	5	W. ampla	5	4	1
W. ampla	4	6	W. ampla	6	5	1	2029
W. ampla	4	13	W. ampla	5	13	1
W. ampla	4	14	W. ampla	9-A	1	0	-
W. ampla	5	4	W. ampla	4	5	1	2071
W. ampla	5	13	W. ampla	4	13	0	-
W. ampla	5	14	W. ampla	8	5	1	1326
W. ampla	6	5	W. ampla	4	6	1	2957
W. ampla	8	5	W. ampla	5	14	1	2639
W. ampla	10	6	W. ampla	9-B	6	1	2359
W. ampla	14	9	W. ampla	15	8	1	2231
W. ampla	15	8	W. ampla	14	9	1	2227
W. ampla	9-A	1	W. ampla	4	14	0	-
W. ampla	9-B	6	W. ampla	10	6	1	1754
W. pedicellata	1	10.1	W. pedicellata	2	6.1	1	463
W. pedicellata	1	10.2	W. pedicellata	2	19.1	1	370
W. pedicellata	1	11.2	W. pedicellata	3	5.1	0	-
W. pedicellata	1	17.2	W. pedicellata	2	18.1	0	-
W. pedicellata	1	18.2	W. pedicellata	3	13.1	1	309
W. pedicellata	2	3.1	W. pedicellata	1	10.1	1	363
W. pedicellata	2	6.1	W. pedicellata	1	10.1	0	-
W. pedicellata	2	17.2	W. pedicellata	3	11.1	1	353
W. pedicellata	2	18.1	W. pedicellata	1	17.2	0	-
W. pedicellata	2	19.1	W. pedicellata	1	10.2	1	405
W. pedicellata	3	5.1	W. pedicellata	1	11.2	1	344
W. pedicellata	3	9.2	W. pedicellata	4	9.1	0	-
W. pedicellata	3	11.1	W. pedicellata	2	17.2	0	-
W. pedicellata	3	13.1	W. pedicellata	1	18.2	1	329
W. pedicellata	3	20	W. pedicellata	4	11.2	1
W. pedicellata	4	9.1	W. pedicellata	3	9.2	0	-
W. pedicellata	4	11.2	W. pedicellata	3	20	1
W. pedicellata	4	21.1	W. pedicellata	6	2.1	1
W. pedicellata	5	3.1	W. pedicellata	7	2.1	0	-
W. pedicellata	5	10.1	W. pedicellata	8	12.2	0	-
W. pedicellata	5	14.2	W. pedicellata	12	13.1	1
W. pedicellata	9	3.1	W. pedicellata	8	15.1	1
W. pedicellata	9	15.1	W. pedicellata	14	1	0	-
W. pedicellata	11	2.2	W. pedicellata	7	5.2	1
W. pedicellata	11	24.1	W. pedicellata	6	21.1	1
W. pedicellata	12	6.1	W. pedicellata	6	3.2	0	-
W. pedicellata	12	13.1	W. pedicellata	5	14.2	1
W. pedicellata	13	5.1	W. pedicellata	8	26.2	0	-
W. pedicellata	13	6.1	W. pedicellata	7	7.2	1
W. pedicellata	13	8.1	W. pedicellata	8	21.1	0	-
W. pedicellata	13	9.1	W. pedicellata	9	22	1
W. subsecunda	1	8	W. subsecunda	3	6	1
W. subsecunda	3	2	W. subsecunda	2	2	0	-
W. subsecunda	6	5	W. subsecunda	5	5	1	803
W. subsecunda	11	7	W. subsecunda	7-A	7	1	138
W. subsecunda	14	6	W. subsecunda	13-A	8	1
W. subsecunda	15	3	W. subsecunda	17	4	1	843
W. subsecunda	15	6	W. subsecunda	9-B	5	0	-
W. subsecunda	17	4	W. subsecunda	15	3	1	695
W. subsecunda	10-A	9	W. subsecunda	7-A	8	0	-
W. subsecunda	13-A	8	W. subsecunda	14	6	1	457
W. subsecunda	7-A	1	W. subsecunda	8-A	3	1	778
W. subsecunda	7-A	7	W. subsecunda	11	7	1	647
W. subsecunda	8-A	3	W. subsecunda	7-A	1	1
W. subsecunda	8-C	7	W. subsecunda	11	7	0	-
W. subsecunda	9-B	5	W. subsecunda	15	6	1	730
W. subsecunda	29B_21	4	W. subsecunda	28_21	7	1
W. subsecunda	28_21	7	W. subsecunda	29B_21	4	1
W. ampla	08_20	7	W. ampla	15B_20	6	1

## Sheet: RI seed germination
Pollen receptor	Pollen donor	Treatment	Plate	Sample	Germinated	Percent			Pollen donor	Treatment	Data
W. pedicellata	W. pedicellata	intra-specific	1	40	34	85			W. ampla		W. ampla Promedio de Percent	W. ampla Desvest de Percent	W. pedicellata				W. pedicellata Promedio de Percent	W. pedicellata Desvest de Percent	W. subsecunda				W. subsecunda Promedio de Percent	W. subsecunda Desvest de Percent	Total Promedio de Percent	Total Desvest de Percent
W. pedicellata	W. pedicellata	intra-specific	2	40	37	92.5			inter-specific				inter-specific		intra-specific				inter-specific		intra-specific
W. pedicellata	W. pedicellata	intra-specific	3	40	39	97.5		Pollen receptor	Promedio de Percent	Desvest de Percent			Promedio de Percent	Desvest de Percent	Promedio de Percent	Desvest de Percent			Promedio de Percent	Desvest de Percent	Promedio de Percent	Desvest de Percent
W. pedicellata	W. pedicellata	intra-specific	4	40	31	77.5		W. pedicellata							92.5	6.742	92.5	6.742	31.875	28.367			31.875	28.367	62.1875	36.9511
W. pedicellata	W. pedicellata	intra-specific	5	40	36	90		W. subsecunda	73.125	12.6637	73.125	12.6637	92.2917	4.93806			92.2917	4.93806			98.75	1.99431	98.75	1.99431	88.0556	13.4578
W. pedicellata	W. pedicellata	intra-specific	6	40	37	92.5		Total Result	73.125	12.6637	73.125	12.6637	92.2917	4.93806	92.5	6.742	92.3958	5.78036	31.875	28.367	98.75	1.99431	65.3125	39.4136	77.7083	28.3377
W. pedicellata	W. pedicellata	intra-specific	7	40	36	90
W. pedicellata	W. pedicellata	intra-specific	8	40	38	95
W. pedicellata	W. pedicellata	intra-specific	9	40	36	90
W. pedicellata	W. pedicellata	intra-specific	10	40	40	100		Calculation of Seed germination Index (RIv) using the method proposed in Sobel and Chen (2014).
W. pedicellata	W. pedicellata	intra-specific	11	40	40	100
W. pedicellata	W. pedicellata	intra-specific	12	40	40	100		Individual barrier not affecting co-occurrence - postzygotic:
W. subsecunda	W. subsecunda	intra-specific	1	40	40	100
W. subsecunda	W. subsecunda	intra-specific	2	40	40	100			W. p x W. s	W. s x W. a	W. s x W. p
W. subsecunda	W. subsecunda	intra-specific	3	40	39	97.5		input C here as the observed fitness of conspecific offspring as affected by focal barrier ->	92.5	98.8	98.8
W. subsecunda	W. subsecunda	intra-specific	4	40	40	100		input H here as the observed fitness of heterospecific offspring as affected by focal barrier ->	31.9	73.1	92.3
W. subsecunda	W. subsecunda	intra-specific	5	40	39	97.5
W. subsecunda	W. subsecunda	intra-specific	6	40	38	95
W. subsecunda	W. subsecunda	intra-specific	7	40	40	100		RI seed germination =	0.487138	0.149506	0.0340136	this value is calculated using equation RI4A
W. subsecunda	W. subsecunda	intra-specific	8	40	40	100
W. subsecunda	W. subsecunda	intra-specific	9	40	40	100
W. subsecunda	W. subsecunda	intra-specific	10	40	40	100
W. subsecunda	W. subsecunda	intra-specific	11	40	40	100
W. subsecunda	W. subsecunda	intra-specific	12	40	38	95
W. pedicellata	W. subsecunda	inter-specific	1	40	23	57.5
W. pedicellata	W. subsecunda	inter-specific	2	40	23	57.5
W. pedicellata	W. subsecunda	inter-specific	3	40	21	52.5
W. pedicellata	W. subsecunda	inter-specific	4	40	18	45
W. pedicellata	W. subsecunda	inter-specific	5	40	22	55
W. pedicellata	W. subsecunda	inter-specific	6	40	24	60
W. pedicellata	W. subsecunda	inter-specific	7	40	22	55
W. pedicellata	W. subsecunda	inter-specific	8	40	0	0
W. pedicellata	W. subsecunda	inter-specific	9	40	0	0
W. pedicellata	W. subsecunda	inter-specific	10	40	0	0
W. pedicellata	W. subsecunda	inter-specific	11	40	0	0
W. pedicellata	W. subsecunda	inter-specific	12	40	0	0
W. subsecunda	W. ampla	inter-specific	1	40	29	72.5
W. subsecunda	W. ampla	inter-specific	2	40	37	92.5
W. subsecunda	W. ampla	inter-specific	3	40	19	47.5
W. subsecunda	W. ampla	inter-specific	4	40	24	60
W. subsecunda	W. ampla	inter-specific	5	40	30	75
W. subsecunda	W. ampla	inter-specific	6	40	25	62.5
W. subsecunda	W. ampla	inter-specific	7	40	31	77.5
W. subsecunda	W. ampla	inter-specific	8	40	28	70
W. subsecunda	W. ampla	inter-specific	9	40	29	72.5
W. subsecunda	W. ampla	inter-specific	10	40	35	87.5
W. subsecunda	W. ampla	inter-specific	11	40	35	87.5
W. subsecunda	W. ampla	inter-specific	12	40	29	72.5
W. subsecunda	W. pedicellata	inter-specific	1	40	39	97.5
W. subsecunda	W. pedicellata	inter-specific	2	40	37	92.5
W. subsecunda	W. pedicellata	inter-specific	3	40	36	90
W. subsecunda	W. pedicellata	inter-specific	4	40	39	97.5
W. subsecunda	W. pedicellata	inter-specific	5	40	36	90
W. subsecunda	W. pedicellata	inter-specific	6	40	33	82.5
W. subsecunda	W. pedicellata	inter-specific	7	40	39	97.5
W. subsecunda	W. pedicellata	inter-specific	8	40	38	95
W. subsecunda	W. pedicellata	inter-specific	9	40	37	92.5
W. subsecunda	W. pedicellata	inter-specific	10	40	35	87.5
W. subsecunda	W. pedicellata	inter-specific	11	40	35	87.5
W. subsecunda	W. pedicellata	inter-specific	12	40	39	97.5

## Sheet: Total isolation
This sheet provide by Sobel and Chen (2014) is designed to calculate cumulative strength (using equation RI4E), absolute contribution (AC), and relative contribution (RC) of multiple barriers with 1 - 2H/(C+H) for one direction of gene flow assuming that interspecific gene flow may be assymmetric.
1) Enter individual isolation estimates obtained from 'individual barriers' worksheets. Space is provided for multiple prezygotic barriers affecting co-occurrence (e.g. ecogeographic, microhabitat, temporal, or pollinator assemblage),
prezygotic barriers not affecting co-occurrence (e.g. pollinator or mating isolation), and postzygotic barriers (e.g. relative hybrid fitness and sterility).
2) If you have fewer barriers than provided in this sheet, enter RI = 0 for the unmeasured barriers.
3) Read output total RI, absolute and relative contributions in the pink cells.
4) Verify that "check 1" is identical to the entered individual barrier strength;"check 2" should be identical to total isolation, and "check 3" should be 1.
NOTE: in the present study the RI values corresponding to floral mechanical (size and position of reproductive organs) are conservative estimates based on the PCA results of floral size and relative position of anthers and stigma (see methods and
results for further details).
	W. ampla x W. nephrolepis												W. nephrolepis x W. ampla
			frequency of gene flow or prop of shared/unshared area for individual barriers		cumulative freq of gene flow										frequency of gene flow or prop of shared/unshared area for individual barriers		cumulative freq of gene flow
Barrier	prezygotic barriers affecting co-occurrence	RI value	shared	unshared	heterospecific	conspecific	cumulative strength	absolute contribution	relative contribution	check 1		Barrier	prezygotic barriers affecting co-occurrence	RI value	shared	unshared	heterospecific	conspecific	cumulative strength	absolute contribution	relative contribution	check 1
Foral phenology	1	0.984246	0.0157542	0.984246	0.00787708	0.992123	0.984246	0.984246	1	0.984246		Foral phenology	1	0.968216	0.0317837	0.968216	0.0158919	0.984108	0.968216	0.968216	0.999739	0.968216
	2	0	1	0	0.00787708	0.992123	0.984246	0	0	0			2	0	1	0	0.0158919	0.984108	0.968216	0	0	0
	3	0	1	0	0.00787708	0.992123	0.984246	0	0	0			3	0	1	0	0.0158919	0.984108	0.968216	0	0	0
	4	0	1	0	0.00787708	0.992123	0.984246	0	0	0			4	0	1	0	0.0158919	0.984108	0.968216	0	0	0
	prezygotic barriers not affecting co-occurrence		heterospecific	conspecific	heterospecific	conspecific							prezygotic barriers not affecting co-occurrence		heterospecific	conspecific	heterospecific	conspecific
Floral mechanical – size	1	0	0.5	0.5	0.00787708	0.992123	0.984246	0	0	0		Floral mechanical – size	1	0	0.5	0.5	0.0158919	0.992123	0.968469	0.000252714	0.000260942	0
Floral mechanical – anthers and stigma position	2	0	0.5	0.5	0.00787708	0.992123	0.984246	0	0	0		Floral mechanical – anthers and stigma position	2	0	0.5	0.5	0.0158919	0.992123	0.968469	0	0	0
Interspecific incompatibility	3	0	0.5	0.5	0.00787708	0.992123	0.984246	0	0	0		Interspecific incompatibility	3	0	0.5	0.5	0.0158919	0.992123	0.968469	0	0	0
	4	0	0.5	0.5	0.00787708	0.992123	0.984246	0	0	0			4	0	0.5	0.5	0.0158919	0.992123	0.968469	0	0	0
	5	0	0.5	0.5	0.00787708	0.992123	0.984246	0	0	0			5	0	0.5	0.5	0.0158919	0.992123	0.968469	0	0	0
	postzygotic		heterospecific	conspecific	heterospecific	conspecific							postzygotic		heterospecific	conspecific	heterospecific	conspecific
Seed production	1	0	0.5	0.5	0.00393854	0.496061	0.984246	0	0	0		Seed production	1	0	0.5	0.5	0.00794593	0.496061	0.968469	0	0	0
Seed viability	2	0	0.5	0.5	0.00196927	0.248031	0.984246	0	0	0		Seed viability	2	0	0.5	0.5	0.00397297	0.248031	0.968469	0	0	0
	3	0	0.5	0.5	0.000984635	0.124015	0.984246	0	0	0			3	0	0.5	0.5	0.00198648	0.124015	0.968469	0	0	0
	4	0	0.5	0.5	0.000492317	0.0620077	0.984246	0	0	0			4	0	0.5	0.5	0.000993241	0.0620077	0.968469	0	0	0
	5	0	0.5	0.5	0.000246159	0.0310038	0.984246	0	0	0			5	0	0.5	0.5	0.000496621	0.0310038	0.968469	0	0	0
	6	0	0.5	0.5	0.000123079	0.0155019	0.984246	0	0	0			6	0	0.5	0.5	0.00024831	0.0155019	0.968469	0	0	0
	7	0	0.5	0.5	6.15397e-05	0.00775096	0.984246	0	0	0			7	0	0.5	0.5	0.000124155	0.00775096	0.968469	0	0	0
									check 2	check 3											check 2	check 3
					Total isolation =			0.984246	0.984246	1							Total isolation =			0.968469	0.968469	1
								igual	igual											igual	igual
	W. ampla x W. pedicellata												W. pedicellata x W. ampla
			frequency of gene flow or prop of shared/unshared area for individual barriers		cumulative freq of gene flow										frequency of gene flow or prop of shared/unshared area for individual barriers		cumulative freq of gene flow
Barrier	prezygotic barriers affecting co-occurrence	RI value	shared	unshared	heterospecific	conspecific	cumulative strength	absolute contribution	relative contribution	check 1		Barrier	prezygotic barriers affecting co-occurrence	RI value	shared	unshared	heterospecific	conspecific	cumulative strength	absolute contribution	relative contribution	check 1
Foral phenology	1	0.496907	0.503093	0.496907	0.251546	0.748454	0.496907	0.496907	0.496907	0.496907		Foral phenology	1	0.466658	0.533342	0.466658	0.266671	0.733329	0.466658	0.466658	0.466658	0.466658
	2	0	1	0	0.251546	0.748454	0.496907	0	0	0			2	0	1	0	0.266671	0.733329	0.466658	0	0	0
	3	0	1	0	0.251546	0.748454	0.496907	0	0	0			3	0	1	0	0.266671	0.733329	0.466658	0	0	0
	4	0	1	0	0.251546	0.748454	0.496907	0	0	0			4	0	1	0	0.266671	0.733329	0.466658	0	0	0
	prezygotic barriers not affecting co-occurrence		heterospecific	conspecific	heterospecific	conspecific							prezygotic barriers not affecting co-occurrence		heterospecific	conspecific	heterospecific	conspecific
Floral mechanical-size	1	1	0	1	0	1	1	0.503093	0.503093	1		Floral mechanical – size	1	1	0	1	0	0.466658	1	0.533342	0.533342	1
Floral mechanical – anthers and stigma position	2	0	0.5	0.5	0	1	1	0	0	0		Floral mechanical – anthers and stigma position	2	0	0.5	0.5	0	0.466658	1	0	0	0
Interspecific incompatibility	3	1	0	1	0	1	1	0	0	1		Interspecific incompatibility	3	1	0	1	0	0.466658	1	0	0	1
	4	0	0.5	0.5	0	1	1	0	0	0			4	0	0.5	0.5	0	0.466658	1	0	0	0
	5	0	0.5	0.5	0	1	1	0	0	0			5	0	0.5	0.5	0	0.466658	1	0	0	0
	postzygotic		heterospecific	conspecific	heterospecific	conspecific							postzygotic		heterospecific	conspecific	heterospecific	conspecific
Seed production	1	0	0.5	0.5	0	0.5	1	0	0	0		Seed production	1	0	0.5	0.5	0	0.233329	1	0	0	0
Seed viability	2	0	0.5	0.5	0	0.25	1	0	0	0		Seed viability	2	0	0.5	0.5	0	0.116665	1	0	0	0
	3	0	0.5	0.5	0	0.125	1	0	0	0			3	0	0.5	0.5	0	0.0583323	1	0	0	0
	4	0	0.5	0.5	0	0.0625	1	0	0	0			4	0	0.5	0.5	0	0.0291661	1	0	0	0
	5	0	0.5	0.5	0	0.03125	1	0	0	0			5	0	0.5	0.5	0	0.0145831	1	0	0	0
	6	0	0.5	0.5	0	0.015625	1	0	0	0			6	0	0.5	0.5	0	0.00729153	1	0	0	0
	7	0	0.5	0.5	0	0.0078125	1	0	0	0			7	0	0.5	0.5	0	0.00364577	1	0	0	0
									check 2	check 3											check 2	check 3
					Total isolation =			1	1	1									Total isolation =	1	1	1
								igual	igual											igual	igual
	W. ampla x W. subsecunda												W. subsecunda x W. ampla
			frequency of gene flow or prop of shared/unshared area for individual barriers		cumulative freq of gene flow										frequency of gene flow or prop of shared/unshared area for individual barriers		cumulative freq of gene flow
Barrier	prezygotic barriers affecting co-occurrence	RI value	shared	unshared	heterospecific	conspecific	cumulative strength	absolute contribution	relative contribution	check 1		Barrier	prezygotic barriers affecting co-occurrence	RI value	shared	unshared	heterospecific	conspecific	cumulative strength	absolute contribution	relative contribution	check 1
Foral phenology	1	0.12757	0.87243	0.12757	0.436215	0.563785	0.12757	0.12757	0.12757	0.12757		Foral phenology	1	0.257952	0.742048	0.257952	0.371024	0.628976	0.257952	0.257952	0.257952	0.257952
	2	0	1	0	0.436215	0.563785	0.12757	0	0	0			2	0	1	0	0.371024	0.628976	0.257952	0	0	0
	3	0	1	0	0.436215	0.563785	0.12757	0	0	0			3	0	1	0	0.371024	0.628976	0.257952	0	0	0
	4	0	1	0	0.436215	0.563785	0.12757	0	0	0			4	0	1	0	0.371024	0.628976	0.257952	0	0	0
	prezygotic barriers not affecting co-occurrence		heterospecific	conspecific	heterospecific	conspecific							prezygotic barriers not affecting co-occurrence		heterospecific	conspecific	heterospecific	conspecific
Floral mechanical – size	1	1	0	1	0	1	1	0.87243	0.87243	1		Floral mechanical – size	1	1	0	1	0	0.257952	1	0.742048	0.742048	1
Floral mechanical – anthers and stigma position	2	1	0	1	0	1	1	0	0	1		Floral mechanical – anthers and stigma position	2	1	0	1	0	0.257952	1	0	0	1
Interspecific incompatibility	3	1	0	1	0	1	1	0	0	1		Interspecific incompatibility	3	0.167939	0.416031	0.583969	0	0.257952	1	0	0	0.167939
	4	0	0.5	0.5	0	1	1	0	0	0			4	0	0.5	0.5	0	0.257952	1	0	0	0
	5	0	0.5	0.5	0	1	1	0	0	0			5	0	0.5	0.5	0	0.257952	1	0	0	0
	postzygotic		heterospecific	conspecific	heterospecific	conspecific							postzygotic		heterospecific	conspecific	heterospecific	conspecific
Seed production	1	0	0.5	0.5	0	0.5	1	0	0	0		Seed production	1	0.49706	0.25147	0.74853	0	0.193084	1	0	0	0.49706
Seed viability	2	0	0.5	0.5	0	0.25	1	0	0	0		Seed viability	2	0.149506	0.425247	0.574753	0	0.110976	1	0	0	0.149506
	3	0	0.5	0.5	0	0.125	1	0	0	0			3	0	0.5	0.5	0	0.0554879	1	0	0	0
	4	0	0.5	0.5	0	0.0625	1	0	0	0			4	0	0.5	0.5	0	0.027744	1	0	0	0
	5	0	0.5	0.5	0	0.03125	1	0	0	0			5	0	0.5	0.5	0	0.013872	1	0	0	0
	6	0	0.5	0.5	0	0.015625	1	0	0	0			6	0	0.5	0.5	0	0.00693599	1	0	0	0
	7	0	0.5	0.5	0	0.0078125	1	0	0	0			7	0	0.5	0.5	0	0.00346799	1	0	0	0
									check 2	check 3											check 2	check 3
							Total isolation =	1	1	1									Total isolation =	1	1	1
								igual	igual											igual	igual
	W. nephrolepis x W. subsecunda												W. subsecunda x W. nephrolepis
			frequency of gene flow or prop of shared/unshared area for individual barriers		cumulative freq of gene flow										frequency of gene flow or prop of shared/unshared area for individual barriers		cumulative freq of gene flow
Barrier	prezygotic barriers affecting co-occurrence	RI value	shared	unshared	heterospecific	conspecific	cumulative strength	absolute contribution	relative contribution	check 1		Barrier	prezygotic barriers affecting co-occurrence	RI value	shared	unshared	heterospecific	conspecific	cumulative strength	absolute contribution	relative contribution	check 1
Foral phenology	1	0.96701	0.0329902	0.96701	0.0164951	0.983505	0.96701	0.96701	0.96701	0.96701		Foral phenology	1	0.982988	0.0170119	0.982988	0.00850594	0.991494	0.982988	0.982988	0.982988	0.982988
	2	0	1	0	0.0164951	0.983505	0.96701	0	0	0			2	0	1	0	0.00850594	0.991494	0.982988	0	0	0
	3	0	1	0	0.0164951	0.983505	0.96701	0	0	0			3	0	1	0	0.00850594	0.991494	0.982988	0	0	0
	4	0	1	0	0.0164951	0.983505	0.96701	0	0	0			4	0	1	0	0.00850594	0.991494	0.982988	0	0	0
	prezygotic barriers not affecting co-occurrence		heterospecific	conspecific	heterospecific	conspecific							prezygotic barriers not affecting co-occurrence		heterospecific	conspecific	heterospecific	conspecific
Floral mechanical – size	1	1	0	1	0	1	1	0.0329902	0.0329902	1		Floral mechanical – size	1	1	0	1	0	0.982988	1	0.0170119	0.0170119	1
Floral mechanical – anthers and stigma position	2	1	0	1	0	1	1	0	0	1		Floral mechanical – anthers and stigma position	2	1	0	1	0	0.982988	1	0	0	1
Interspecific incompatibility	3	0	0.5	0.5	0	1	1	0	0	0		Interspecific incompatibility	3	0	0.5	0.5	0	0.982988	1	0	0	0
	4	0	0.5	0.5	0	1	1	0	0	0			4	0	0.5	0.5	0	0.982988	1	0	0	0
	5	0	0.5	0.5	0	1	1	0	0	0			5	0	0.5	0.5	0	0.982988	1	0	0	0
	postzygotic		heterospecific	conspecific	heterospecific	conspecific							postzygotic		heterospecific	conspecific	heterospecific	conspecific
Seed production	1	0	0.5	0.5	0	0.5	1	0	0	0		Seed production	1	0	0.5	0.5	0	0.491494	1	0	0	0
Seed viability	2	0	0.5	0.5	0	0.25	1	0	0	0		Seed viability	2	0	0.5	0.5	0	0.245747	1	0	0	0
	3	0	0.5	0.5	0	0.125	1	0	0	0			3	0	0.5	0.5	0	0.122874	1	0	0	0
	4	0	0.5	0.5	0	0.0625	1	0	0	0			4	0	0.5	0.5	0	0.0614368	1	0	0	0
	5	0	0.5	0.5	0	0.03125	1	0	0	0			5	0	0.5	0.5	0	0.0307184	1	0	0	0
	6	0	0.5	0.5	0	0.015625	1	0	0	0			6	0	0.5	0.5	0	0.0153592	1	0	0	0
	7	0	0.5	0.5	0	0.0078125	1	0	0	0			7	0	0.5	0.5	0	0.00767959	1	0	0	0
									check 2	check 3											check 2	check 3
							Total isolation =	1	1	1							Total isolation =			1	1	1
								igual	igual											igual	igual
	W. pedicellata x W. subsecunda												W. subsecunda x W. pedicellata
			frequency of gene flow or prop of shared/unshared area for individual barriers		cumulative freq of gene flow										frequency of gene flow or prop of shared/unshared area for individual barriers		cumulative freq of gene flow
Barrier	prezygotic barriers affecting co-occurrence	RI value	shared	unshared	heterospecific	conspecific	cumulative strength	absolute contribution	relative contribution	check 1		Barrier	prezygotic barriers affecting co-occurrence	RI value	shared	unshared	heterospecific	conspecific	cumulative strength	absolute contribution	relative contribution	check 1
Foral phenology	1	0.345038	0.654962	0.345038	0.327481	0.672519	0.345038	0.345038	0.345038	0.345038		Foral phenology	1	0.554063	0.445937	0.554063	0.222968	0.777032	0.554063	0.554063	0.554063	0.554063
	2	0	1	0	0.327481	0.672519	0.345038	0	0	0			2	0	1	0	0.222968	0.777032	0.554063	0	0	0
	3	0	1	0	0.327481	0.672519	0.345038	0	0	0			3	0	1	0	0.222968	0.777032	0.554063	0	0	0
	4	0	1	0	0.327481	0.672519	0.345038	0	0	0			4	0	1	0	0.222968	0.777032	0.554063	0	0	0
	prezygotic barriers not affecting co-occurrence		heterospecific	conspecific	heterospecific	conspecific							prezygotic barriers not affecting co-occurrence		heterospecific	conspecific	heterospecific	conspecific
Floral mechanical – size	1	0	0.5	0.5	0.327481	0.672519	0.345038	0	0	0		Floral mechanical – size	1	0	0.5	0.5	0.222968	0.777032	0.554063	0	0	0
Floral mechanical – anthers and stigma position	2	1	0	1	0	1	1	0.654962	0.654962	1		Floral mechanical – anthers and stigma position	2	1	0	1	0	0.554063	1	0.445937	0.445937	1
Interspecific incompatibility	3	0.0969508	0.451525	0.548475	0	1	1	0	0	0.0969508		Interspecific incompatibility	3	0.348018	0.325991	0.674009	0	0.554063	1	0	0	0.348018
	4	0	0.5	0.5	0	1	1	0	0	0			4	0	0.5	0.5	0	0.554063	1	0	0	0
	5	0	0.5	0.5	0	1	1	0	0	0			5	0	0.5	0.5	0	0.554063	1	0	0	0
	postzygotic		heterospecific	conspecific	heterospecific	conspecific							postzygotic		heterospecific	conspecific	heterospecific	conspecific
Seed production	1	0.413986	0.293007	0.706993	0	0.706993	1	0	0	0.413986		Seed production	1	0.316508	0.341746	0.658254	0	0.364714	1	0	0	0.316508
Seed viability	2	0.487138	0.256431	0.743569	0	0.525698	1	0	0	0.487138		Seed viability	2	0.0340136	0.482993	0.517007	0	0.18856	1	0	0	0.0340136
	3	0	0.5	0.5	0	0.262849	1	0	0	0			3	0	0.5	0.5	0	0.0942799	1	0	0	0
	4	0	0.5	0.5	0	0.131425	1	0	0	0			4	0	0.5	0.5	0	0.0471399	1	0	0	0
	5	0	0.5	0.5	0	0.0657123	1	0	0	0			5	0	0.5	0.5	0	0.02357	1	0	0	0
	6	0	0.5	0.5	0	0.0328561	1	0	0	0			6	0	0.5	0.5	0	0.011785	1	0	0	0
	7	0	0.5	0.5	0	0.0164281	1	0	0	0			7	0	0.5	0.5	0	0.00589249	1	0	0	0
									check 2	check 3											check 2	check 3
							Total isolation =	1	1	1									Total isolation =	1	1	1
								igual	igual											igual	igual
	W. pedicellata x W. nephrolepis												W. nephrolepis x W. pedicellata
			frequency of gene flow or prop of shared/unshared area for individual barriers		cumulative freq of gene flow										frequency of gene flow or prop of shared/unshared area for individual barriers		cumulative freq of gene flow
Barrier	prezygotic barriers affecting co-occurrence	RI value	shared	unshared	heterospecific	conspecific	cumulative strength	absolute contribution	relative contribution	check 1		Barrier	prezygotic barriers affecting co-occurrence	RI value	shared	unshared	heterospecific	conspecific	cumulative strength	absolute contribution	relative contribution	check 1
Foral phenology	1	0.978532	0.0214676	0.978532	0.0107338	0.989266	0.978532	0.978532	0.978532	0.978532		Foral phenology	1	0.991232	0.00876835	0.991232	0.00438417	0.995616	0.991232	0.991232	0.991232	0.991232
	2	0	1	0	0.0107338	0.989266	0.978532	0	0	0			2	0	1	0	0.00438417	0.995616	0.991232	0	0	0
	3	0	1	0	0.0107338	0.989266	0.978532	0	0	0			3	0	1	0	0.00438417	0.995616	0.991232	0	0	0
	4	0	1	0	0.0107338	0.989266	0.978532	0	0	0			4	0	1	0	0.00438417	0.995616	0.991232	0	0	0
	prezygotic barriers not affecting co-occurrence		heterospecific	conspecific	heterospecific	conspecific							prezygotic barriers not affecting co-occurrence		heterospecific	conspecific	heterospecific	conspecific
Floral mechanical – size	1	1	0	1	0	1	1	0.0214676	0.0214676	1		Floral mechanical – size	1	1	0	1	0	0.991232	1	0.00876835	0.00876835	1
Floral mechanical – anthers and stigma position	2	0	0.5	0.5	0	1	1	0	0	0		Floral mechanical – anthers and stigma position	2	0	0.5	0.5	0	0.991232	1	0	0	0
Interspecific incompatibility	3	0	0.5	0.5	0	1	1	0	0	0		Interspecific incompatibility	3	0	0.5	0.5	0	0.991232	1	0	0	0
	4	0	0.5	0.5	0	1	1	0	0	0			4	0	0.5	0.5	0	0.991232	1	0	0	0
	5	0	0.5	0.5	0	1	1	0	0	0			5	0	0.5	0.5	0	0.991232	1	0	0	0
	postzygotic		heterospecific	conspecific	heterospecific	conspecific							postzygotic		heterospecific	conspecific	heterospecific	conspecific
Seed production	1	0	0.5	0.5	0	0.5	1	0	0	0		Seed production	1	0	0.5	0.5	0	0.495616	1	0	0	0
Seed viability	2	0	0.5	0.5	0	0.25	1	0	0	0		Seed viability	2	0	0.5	0.5	0	0.247808	1	0	0	0
	3	0	0.5	0.5	0	0.125	1	0	0	0			3	0	0.5	0.5	0	0.123904	1	0	0	0
	4	0	0.5	0.5	0	0.0625	1	0	0	0			4	0	0.5	0.5	0	0.061952	1	0	0	0
	5	0	0.5	0.5	0	0.03125	1	0	0	0			5	0	0.5	0.5	0	0.030976	1	0	0	0
	6	0	0.5	0.5	0	0.015625	1	0	0	0			6	0	0.5	0.5	0	0.015488	1	0	0	0
	7	0	0.5	0.5	0	0.0078125	1	0	0	0			7	0	0.5	0.5	0	0.007744	1	0	0	0
									check 2	check 3											check 2	check 3
							Total isolation =	1	1	1									Total isolation =	1	1	1
								igual	igual											igual	igual
